# Supplementary material for: Theoretical studies on the photochemistry of 2-nitrofluorene in the gas phase and acetonitrile solution
Source: Royal Society of Chemistry journal article supplement (doi:10.1039/d0cp01969k), 2020-01-01
Supplement: d0cp01969k1.pdf [file d0cp01969k1.pdf]

## **Supplementary Materials for “Theoretical studies on the photochemistry of 2-nitrofluorene in the gas phase and acetonitrile solution”**

Li Bo,<sup>1</sup> Teng-Shuo Zhang,<sup>2</sup> Jiadan Xue,<sup>3</sup> Bin-Bin Xie,<sup>1\*</sup>, Wei-Hai Fang,<sup>1,2</sup> and Lin Shen<sup>2\*</sup>

1) *Hangzhou Institute of Advanced Studies, Zhejiang Normal University, 1108 Gengwen Road, Hangzhou 311231, Zhejiang, P. R. China.*

2) *Key Laboratory of Theoretical and Computational Photochemistry, Ministry of Education College of Chemistry, Beijing Normal University, Beijing 100875, P. R. China.*

3) *Department of Chemistry, Zhejiang Sci-Tech University, Hangzhou 310018, China.*

---

\*Author to whom correspondence should be addressed.

Email: [binbinxie@mail.bnu.edu.cn](mailto:binbinxie@mail.bnu.edu.cn), [lshen@bnu.edu.cn](mailto:lshen@bnu.edu.cn).

## Table of Contents

Molecular orbitals in the gas phase

Critical structures in the gas phase

LIIC paths in the gas phase and acetonitrile solution

PES scanned along selected reaction coordinates in the gas phase

Reaction process related to intramolecular rearrangement mechanism in the gas phase

Active space choice

Number of CI roots in SA-CASSCF method

Inclusion of solvent in QM subsystem

Solvent configurations in QM/MM calculation

Comparison on scanned PESs between different computational models

Resonant structure of nitro group

Additional discussions

Cartesian coordinates of all reported structures

## Molecular orbitals in the gas phase

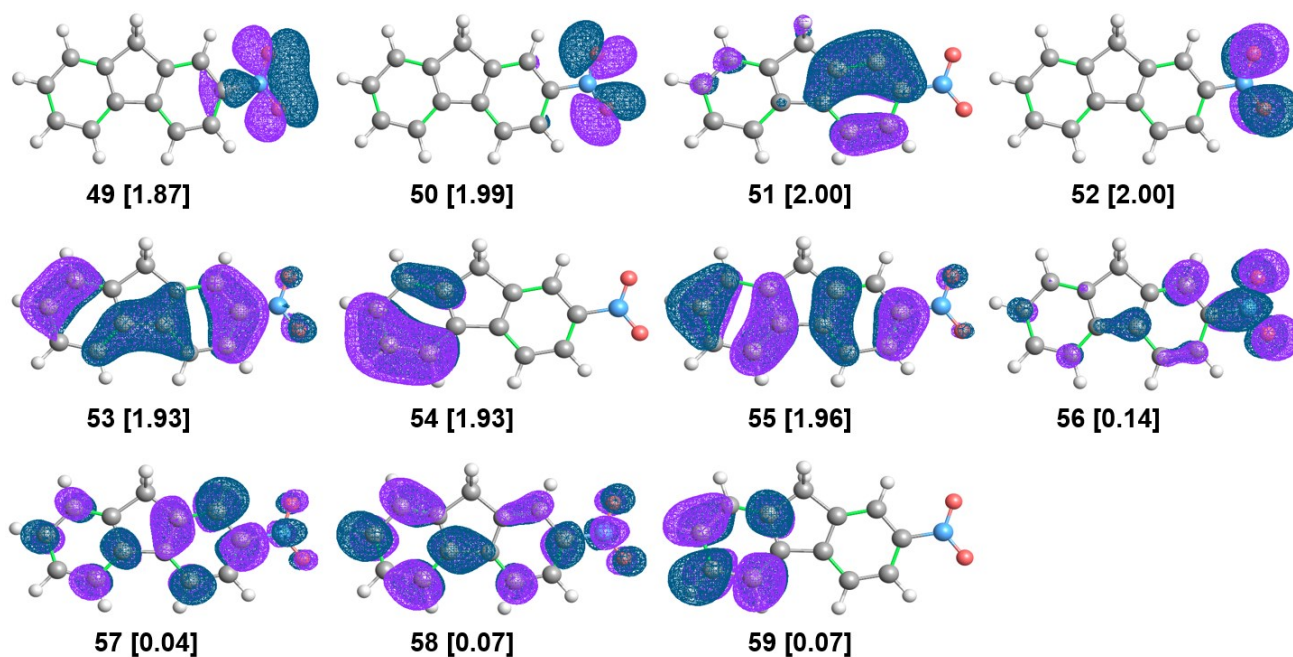

**Figure S1.** Molecular orbitals in the active space for SA5-CASSCF and MS-CASPT2 computations in the gas phase. The occupation numbers corresponding to natural orbitals in the ground state are shown in brackets.

## Critical structures in the gas phase

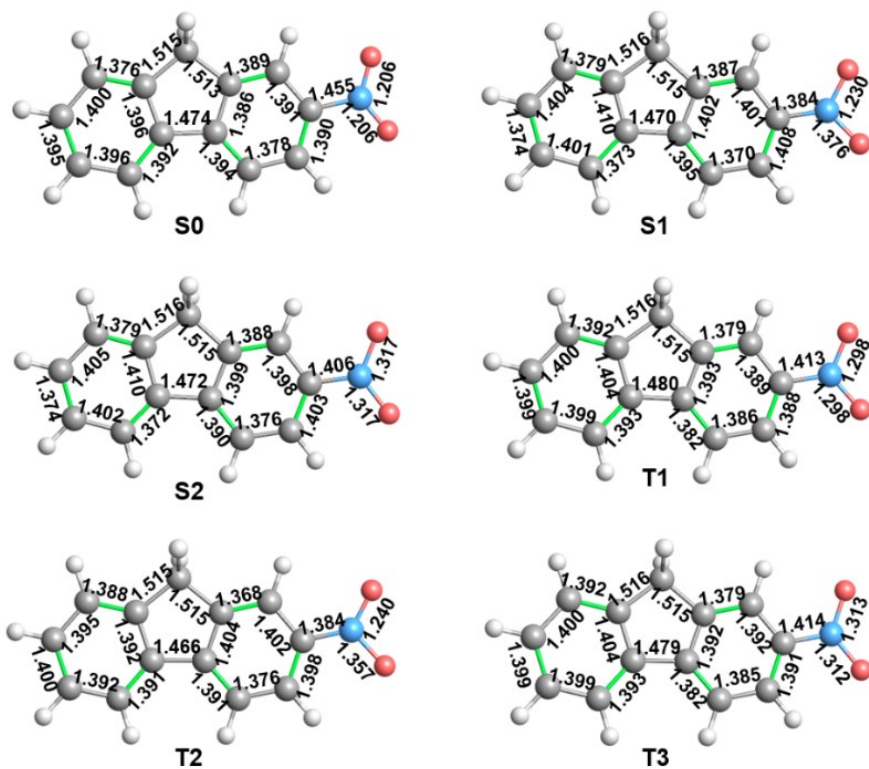

**Figure S2.** SA5-CASSCF(14,11) optimized minimum-energy structures in the lowest six electronically singlet and triplet states in the gas phase. Also shown are the selected bond lengths.

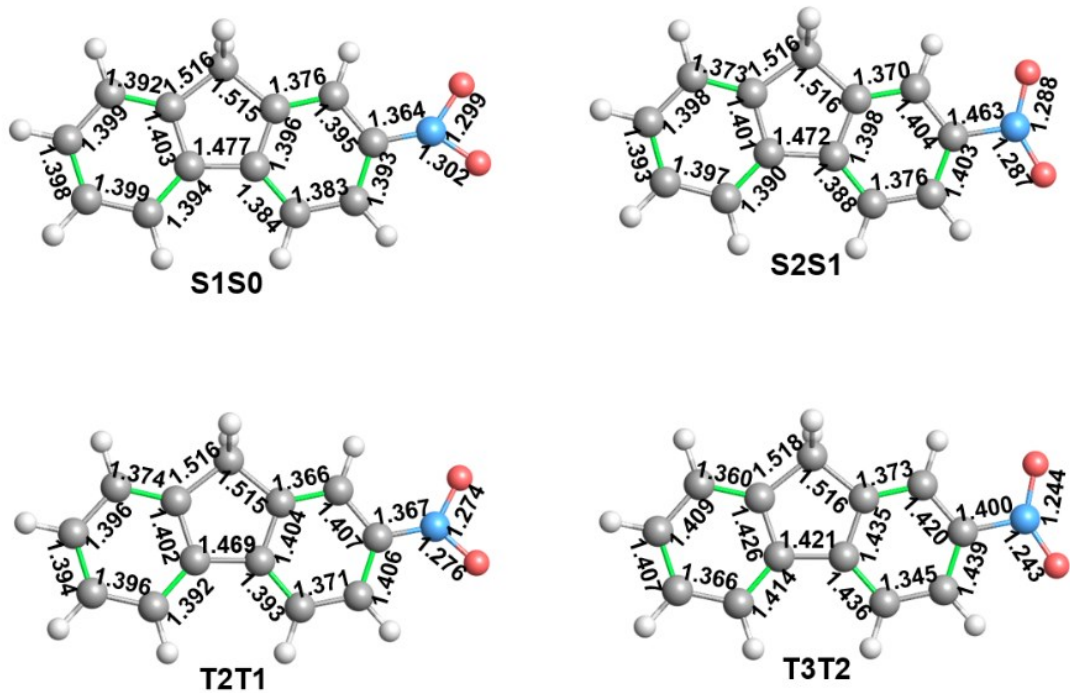

**Figure S3.** Minimum-energy conical intersections of 2-NF in the gas phase between excited singlet and triplet states optimized at the SA5-CASSCF(14,11) level. Also shown are the selected bond lengths.

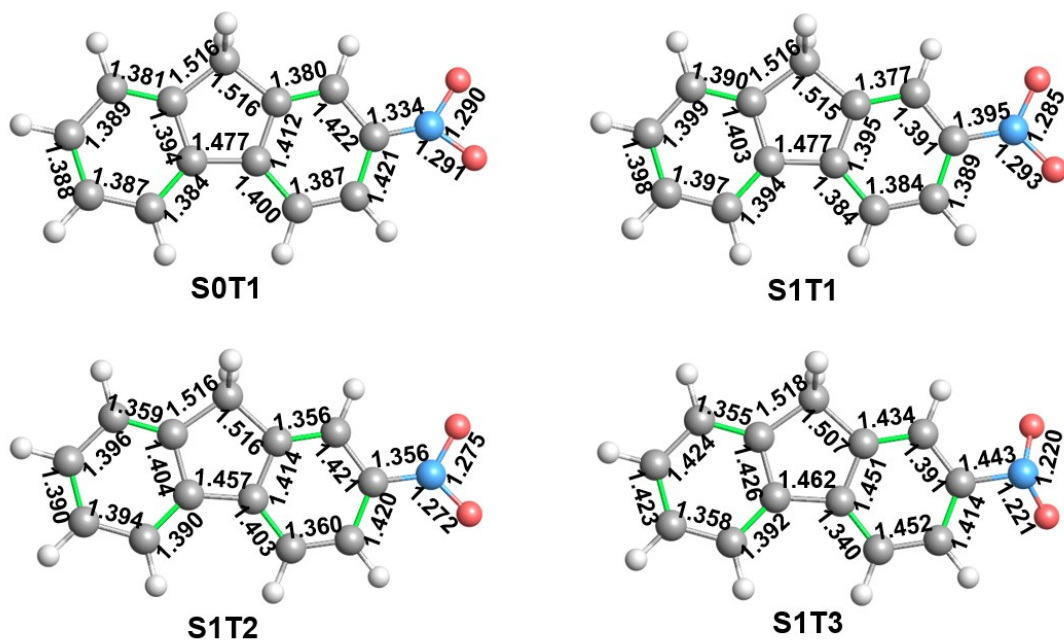

**Figure S4.** Minimum-energy crossing points of 2-NF in the gas phase between different excited singlet and triplet states optimized at the SA5-CASSCF(14,11) level. Also shown are the selected bond lengths.

## LIIC paths in the gas phase and acetonitrile solution

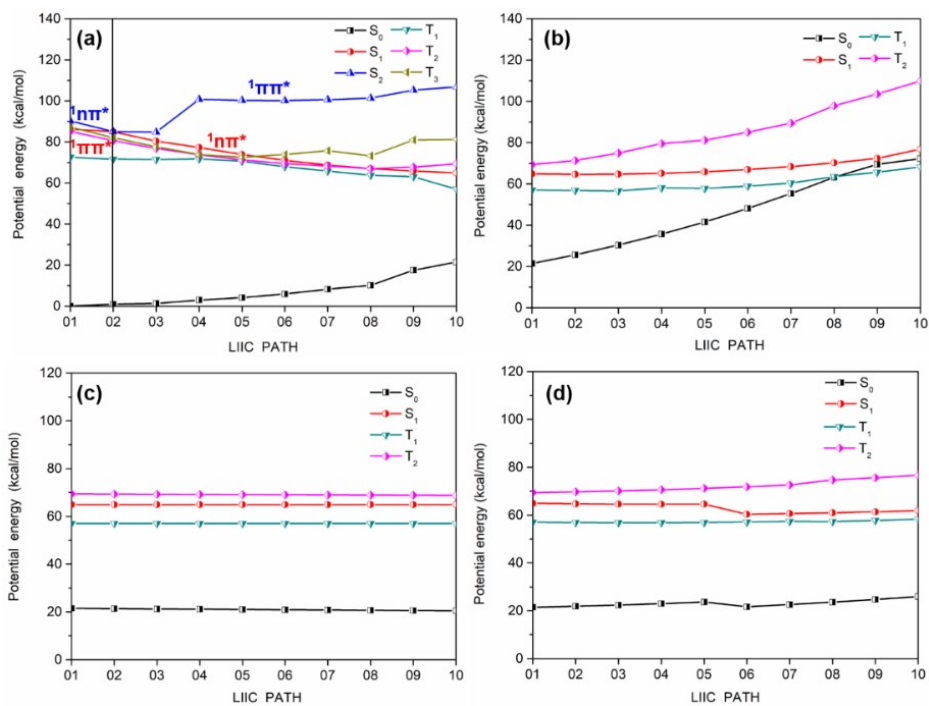

**Figure S5.** MS-CASPT2 computed linearly interpolated internal coordinate (LIIC) paths in the gas phase connecting (a) the  $S_1$ -FC point and  $S_1$  minimum; (b)  $S_1$  minimum and the  $S_1/S_0$  conical intersection; (c) the  $S_1$  minimum and the  $S_1/T_2$  crossing point; (d) the  $S_1$  minimum and the  $S_1/T_1$  crossing point.

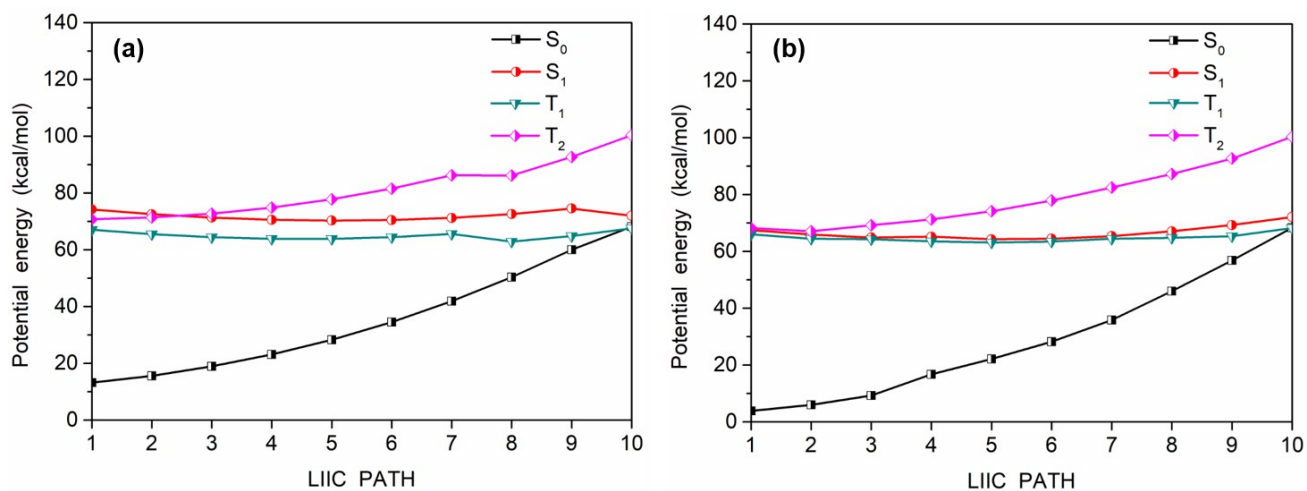

**Figure S6.** MS-CASPT2 and QM(MS-CASPT2)/MM computed linearly interpolated internal coordinate (LIIC) paths connecting the  $T_1$  minimum and  $S_0/T_1$  crossing point in the gas phase (a) and acetonitrile solution (b).



## PES scanned along selected reaction coordinates in the gas phase

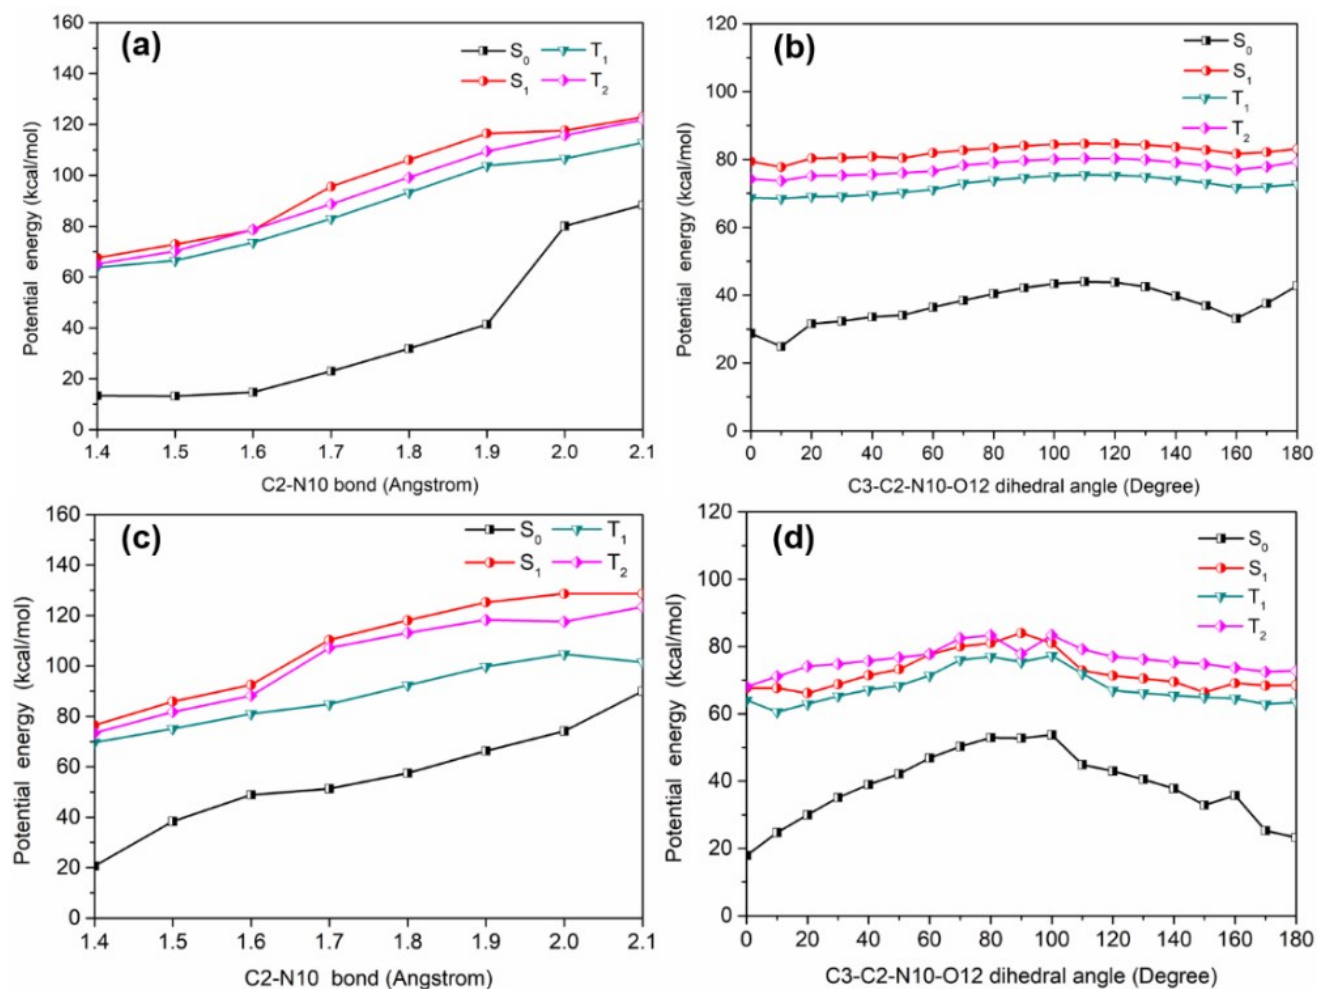

**Figure S7.** PESs scanned along the C<sub>2</sub>-N<sub>10</sub> bond and the C<sub>3</sub>-C<sub>2</sub>-N<sub>10</sub>-O<sub>12</sub> dihedral angle in the T<sub>1</sub> (a,b) and S<sub>1</sub> (c,d) states in the gas phase at MS-CASPT2 level.

## Reaction process related to intramolecular rearrangement mechanism in gas phase

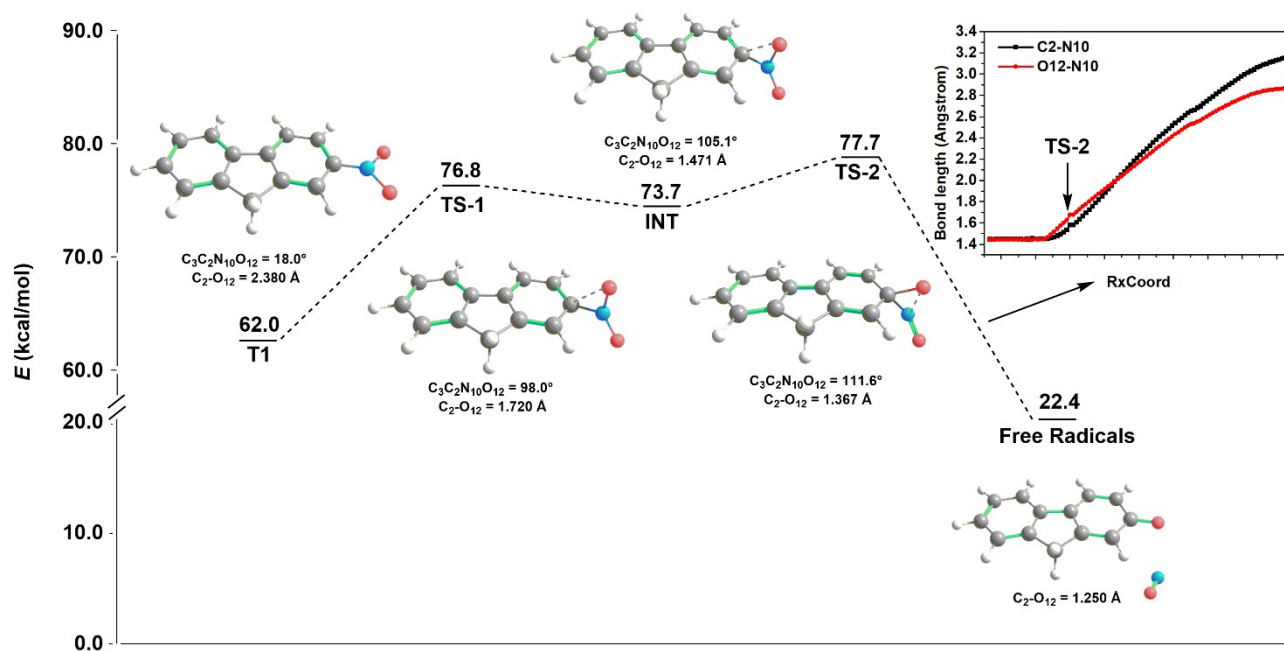

**Figure S8.** MN15 computed intramolecular rearrangement reaction mechanism of the 2-NF system in the  $T_1$  state in the gas phase.

## Active space choice

**Table S1.** Vertical excitation energies and electronic configurations obtained using different computational models [units: kcal/mol].

| active space       | 5-state-averaged                              |                                               |                                               |                                               | 8-state-averaged                              |
|--------------------|-----------------------------------------------|-----------------------------------------------|-----------------------------------------------|-----------------------------------------------|-----------------------------------------------|
|                    | I (14,11)                                     | II (14,11)                                    | III (14,11)                                   | IV (16,12)                                    | IV (16,12)                                    |
| S <sub>1</sub> -FC | 331.7<br>( $\pi_{\text{H}}\pi^*_{\text{L}}$ ) | 324.1<br>( $n_{\text{H-4}}\pi^*_{\text{L}}$ ) | 330.8<br>( $n_{\text{H-4}}\pi^*_{\text{L}}$ ) | 327.1<br>( $n_{\text{H-4}}\pi^*_{\text{L}}$ ) | 331.8<br>( $n_{\text{H-4}}\pi^*_{\text{L}}$ ) |
| S <sub>2</sub> -FC | 316.9<br>( $n_{\text{H-4}}\pi^*_{\text{L}}$ ) | 278.9<br>( $n_{\text{H-3}}\pi^*_{\text{L}}$ ) | 311.7<br>( $\pi_{\text{H}}\pi^*_{\text{L}}$ ) | 287.1<br>( $n_{\text{H-3}}\pi^*_{\text{L}}$ ) | 319.6<br>( $\pi_{\text{H}}\pi^*_{\text{L}}$ ) |

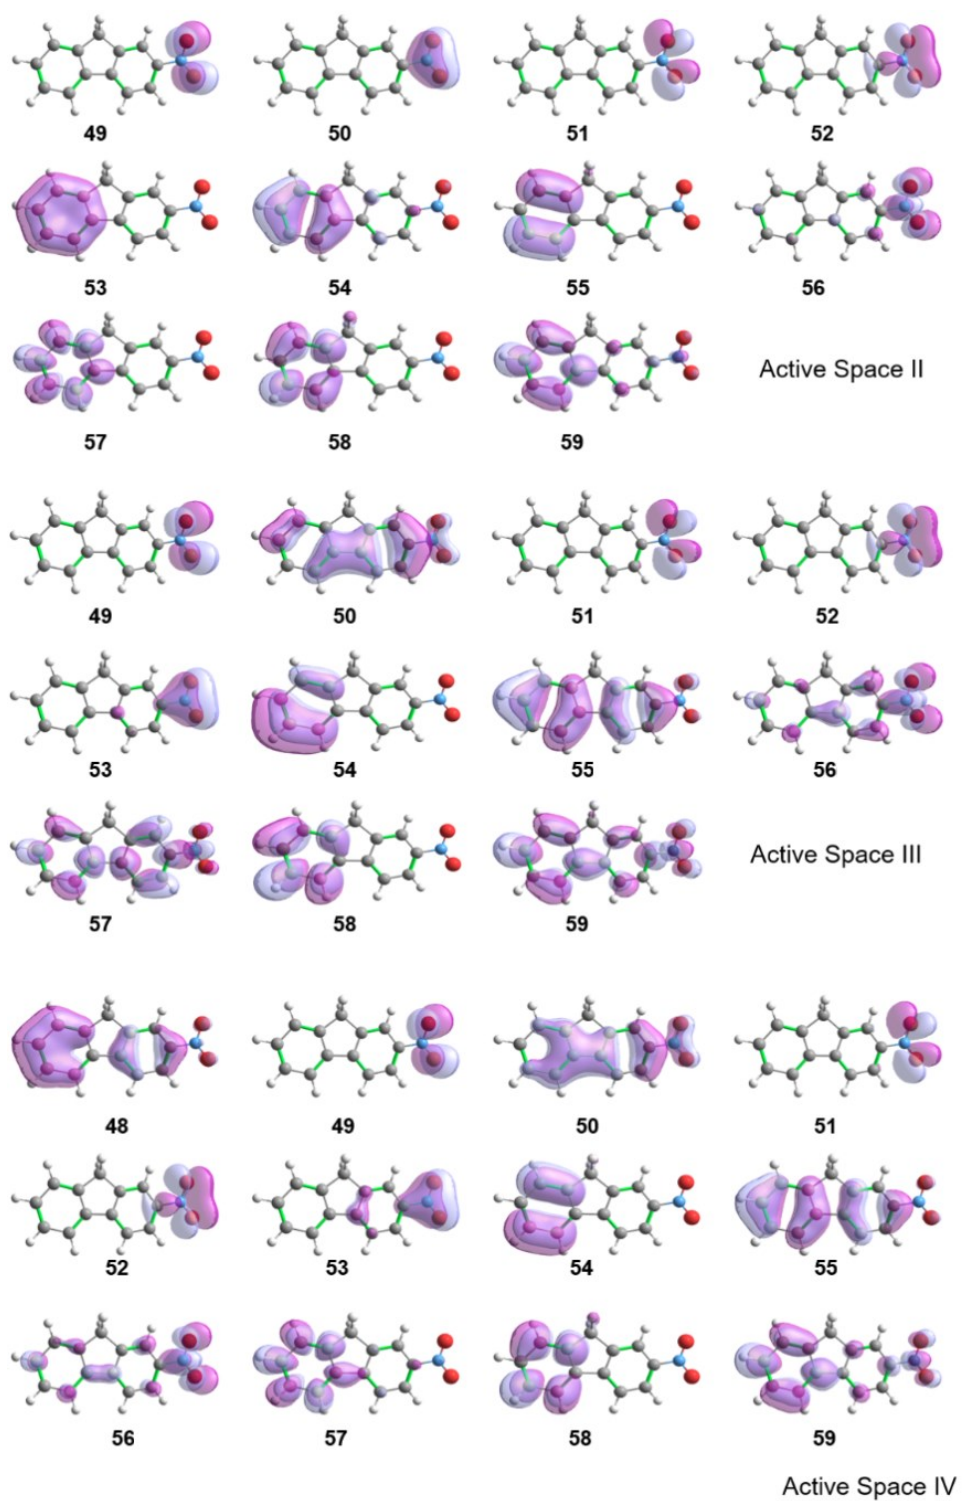

**Figure S9.** Different molecular orbitals included in active spaces II, III and IV.

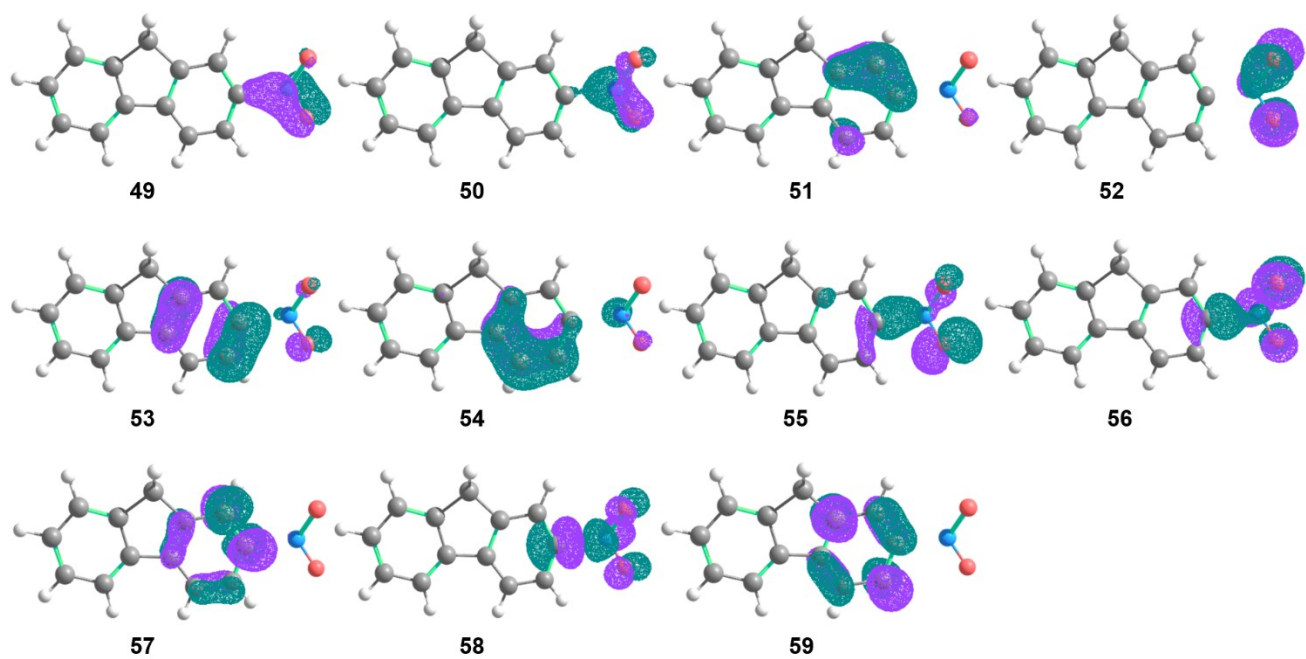

**Figure S10.** Active space including the  $\sigma$  and  $\sigma^*$  orbitals with the elongation of the C-N bond during photodegradation reaction.

## Number of CI roots in SA-CASSCF method

**Table S2.** Vertical excitation energies and electronic configurations obtained using different computational models [units: kcal/mol (nm)].

|                    | MS-CASPT2//CASSCF/MM  |                      |                      | MN15/MM      | Exp.         |
|--------------------|-----------------------|----------------------|----------------------|--------------|--------------|
|                    | 3-state-averaged      | 4-state-averaged     | 5-state-averaged     |              |              |
| S <sub>1</sub> -FC | 90.9 (314.5)<br>1nπ*  | 90.2 (317.2)<br>1nπ* | 85.1 (336.1)<br>1ππ* | 84.3 (339.3) | 85.9 (333.0) |
| S <sub>2</sub> -FC | 103.5 (276.3)<br>1nπ* | 98.2 (291.3)<br>1ππ* | 91.6 (312.2)<br>1nπ* | 89.7 (318.7) |              |

## Inclusion of solvent in QM subsystem

**Table S3.** QM(MS-CASPT2)/MM vertical and adiabatic excitation energies  
[units: kcal/mol].

|                              | S <sub>0</sub> -min | S <sub>1</sub> -FC | S <sub>2</sub> -FC | S <sub>1</sub> -min | T <sub>1</sub> -min |
|------------------------------|---------------------|--------------------|--------------------|---------------------|---------------------|
| no CH <sub>3</sub> CN in QM  | 0.0                 | 85.1               | 91.6               | 71.2                | 65.9                |
| one CH <sub>3</sub> CN in QM | 0.0                 | 84.3               | 91.7               | 73.0                | 65.6                |

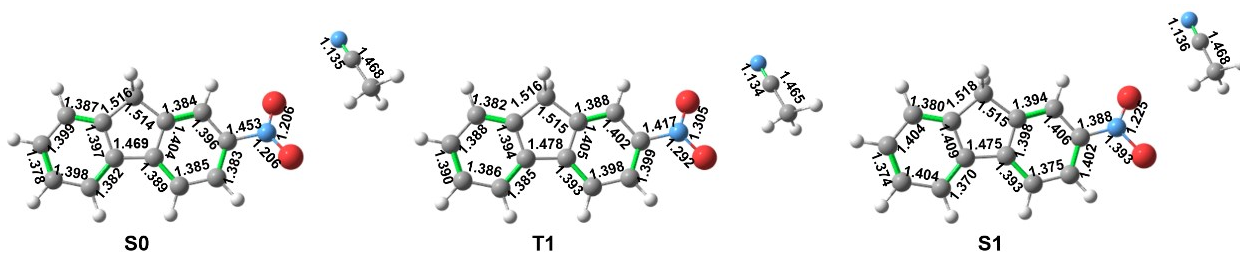

**Figure S11.** The S<sub>0</sub>, T<sub>1</sub> and S<sub>1</sub> minimum structures that involves one acetonitrile molecule in QM subsystem optimized at the QM(SA5-CASSCF(14,11))/MM level.



## Solvent configurations in QM/MM calculation

**Table S4.** QM(MS-CASPT2)/MM vertical excitation energies from the snapshots at 30, 40 and 50 ps  
[units: kcal/mol].

|       | S <sub>0</sub> -min | S <sub>1</sub> -FC | S <sub>2</sub> -FC | T <sub>1</sub> -FC | T <sub>2</sub> -FC | T <sub>3</sub> -FC |
|-------|---------------------|--------------------|--------------------|--------------------|--------------------|--------------------|
| 30 ps | 0.0                 | 87.1               | 89.7               | 66.9               | 81.7               | 85.6               |
| 40 ps | 0.0                 | 84.9               | 90.5               | 62.9               | 83.3               | 83.5               |
| 50 ps | 0.0                 | 85.1               | 91.6               | 65.8               | 84.3               | 84.7               |

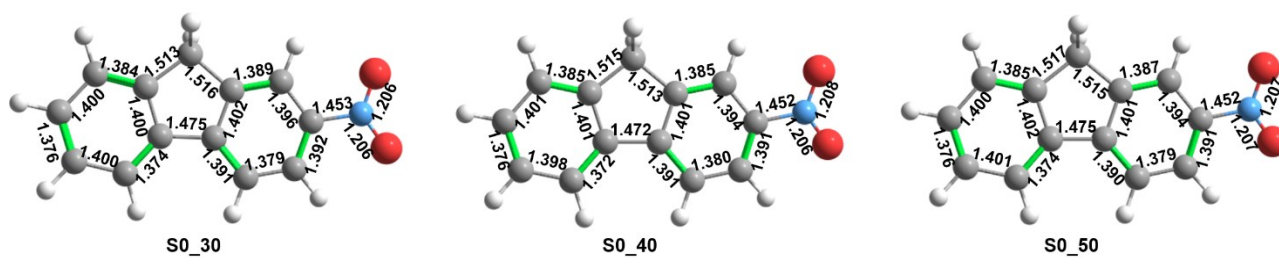

**Figure S12.** QM(SA5-CASSCF(14,11))/MM optimized  $S_0$  minimum-energy structures from different snapshots at 30, 40 and 50 ps in acetonitrile solvent. Also shown are the selected bond lengths.

## Comparison on scanned PESs between different computational models

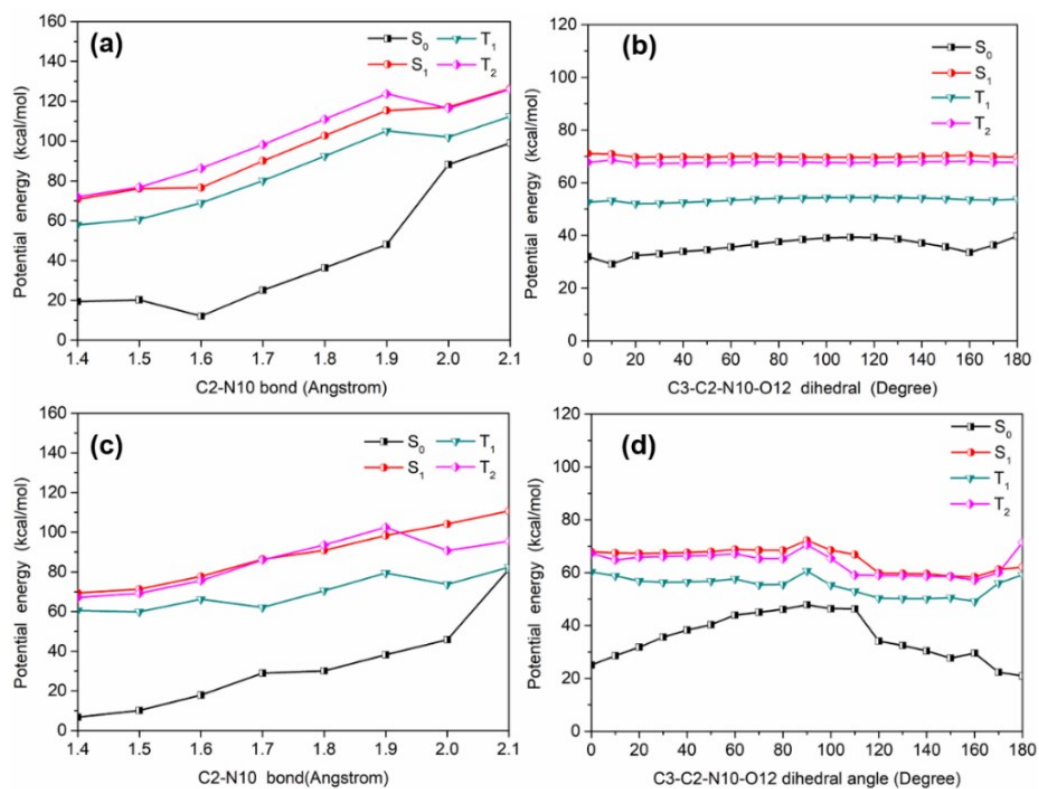

**Figure S13.** PESs scanned along the  $C_2-N_{10}$  bond and the  $C_3-C_2-N_{10}-O_{12}$  dihedral angle in the  $T_1$  (a,b) and  $S_1$  (c,d) states in the gas phase at SA5-CASSCF level.

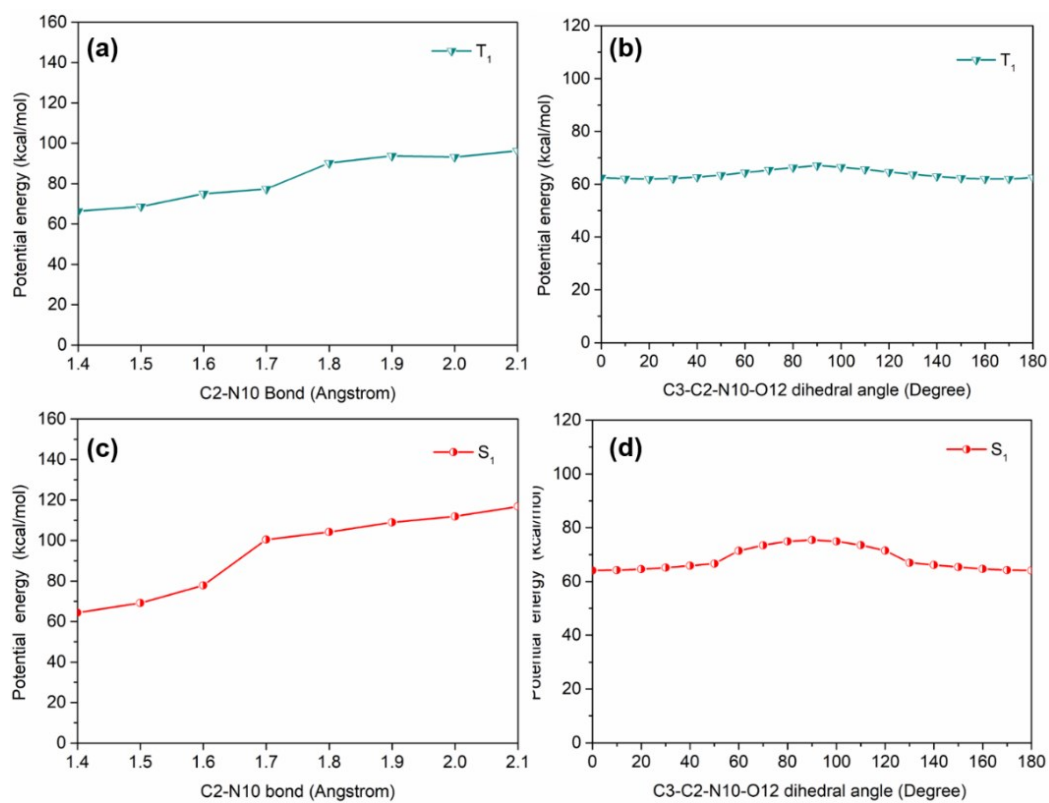

**Figure S14.** PESs scanned along the  $C_2-N_{10}$  bond and the  $C_3-C_2-N_{10}-O_{12}$  dihedral angle in the  $T_1$  (a,b) and  $S_1$  (c,d) states in the gas phase at MN15 level.

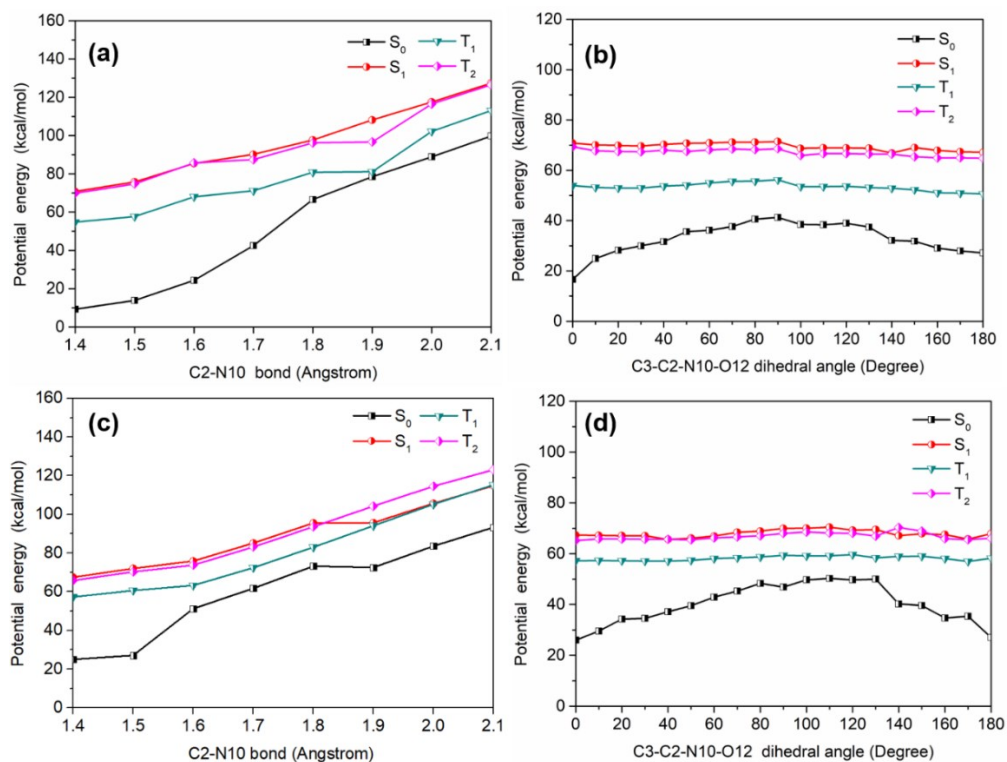

**Figure S15.** PESs scanned along the  $C_2-N_{10}$  bond and the  $C_3-C_2-N_{10}-O_{12}$  dihedral angle in the  $T_1$  (a,b) and  $S_1$  (c,d) states in acetonitrile solution at QM(SA5- CASSCF)/MM level.

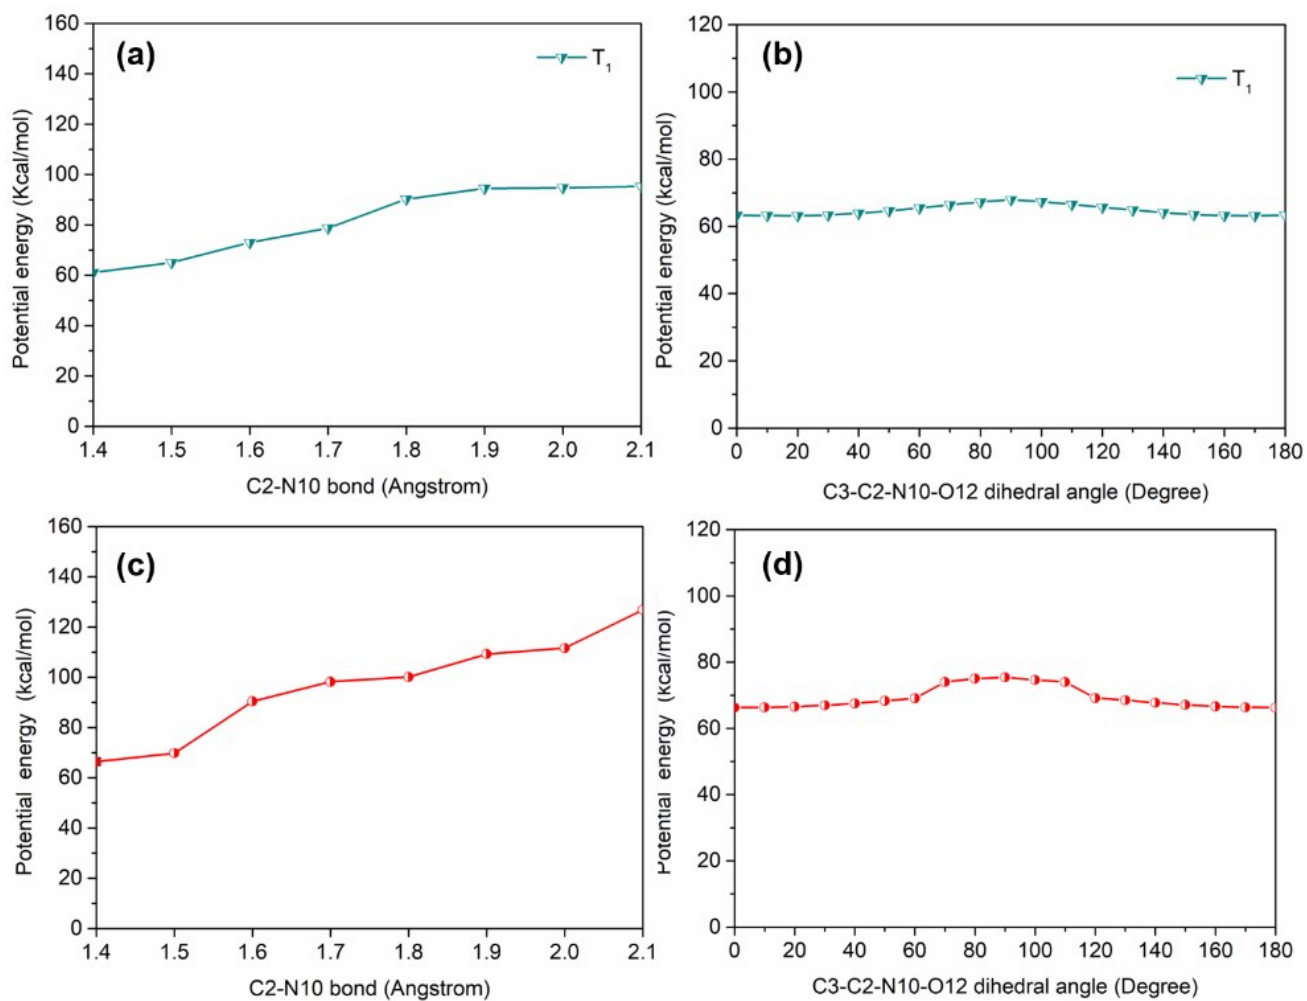

**Figure S16.** PESs scanned along the C<sub>2</sub>-N<sub>10</sub> bond and t the C<sub>3</sub>-C<sub>2</sub>-N<sub>10</sub>-O<sub>12</sub> dihedral angle in the T<sub>1</sub> (a,b) and S<sub>1</sub> (c,d) states in acetonitrile solution at MN15/PCM level.

## Resonant structure of nitro group

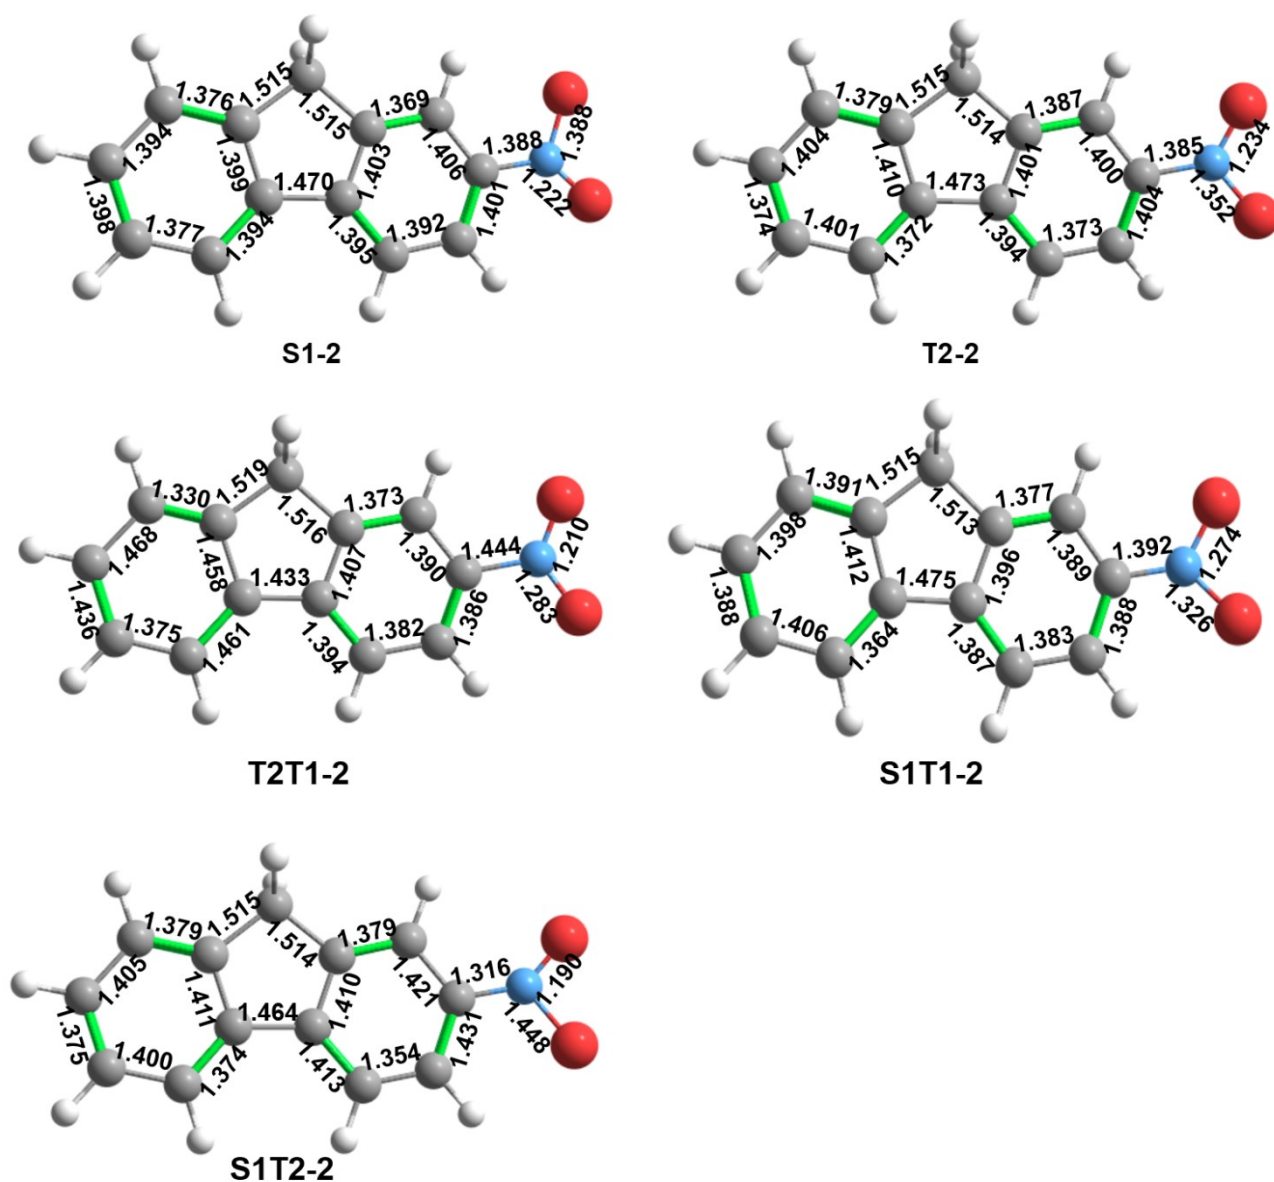

**Figure S17.** QM(SA5-CASSCF(14,11))/MM optimized additional minimum and surface-crossing structures in acetonitrile solution.

**Table S5.** QM(MS-CASPT2)/MM computed adiabatic excitation energies of additional minimum and surface-crossing structures in acetonitrile solution relative to their S<sub>0</sub> minima [units: kcal/mol].

| <b>Structures</b> | <b>Energies</b>  | <b>Structures</b> | <b>Energies</b>  |
|-------------------|------------------|-------------------|------------------|
| <b>S1</b>         | <b>71.2</b>      | <b>T2T1-2</b>     | <b>71.9/73.0</b> |
| <b>S1-2</b>       | <b>72.4</b>      | <b>S1T1</b>       | <b>76.8/73.5</b> |
| <b>T2</b>         | <b>71.3</b>      | <b>S1T1-2</b>     | <b>70.3/74.4</b> |
| <b>T2-2</b>       | <b>71.2</b>      | <b>S1T2</b>       | <b>73.2/72.8</b> |
| <b>T2T1</b>       | <b>72.5/76.7</b> | <b>S1T2-2</b>     | <b>76.3/79.1</b> |



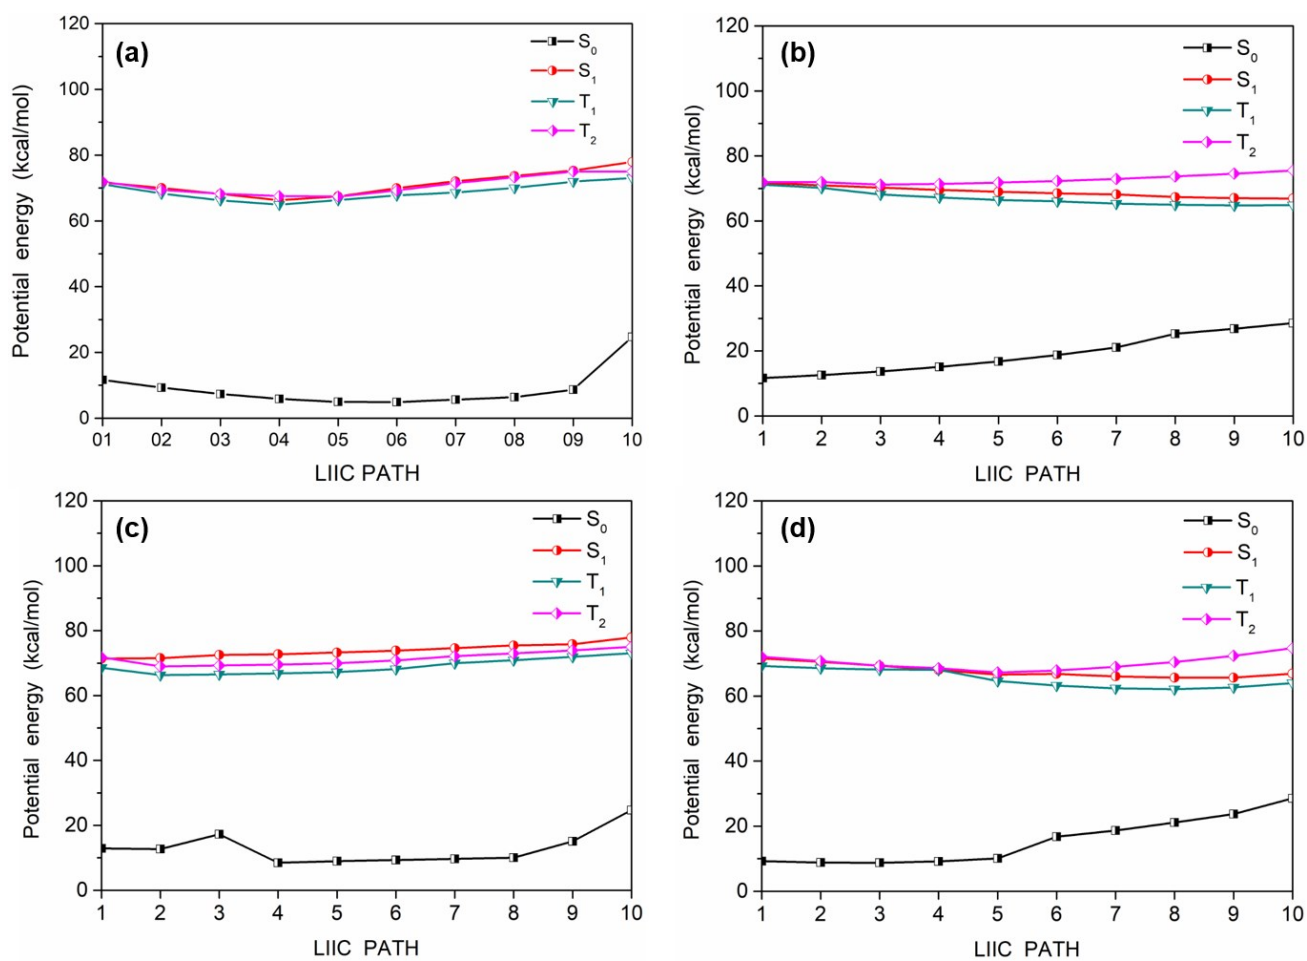

**Figure S18.** QM(MS-CASPT2)/MM computed linearly interpolated internal coordinate (LIIC) paths connecting the  $S_1$  minimum and the  $S_1/T_1$  crossing point (a); the  $S_1$  minimum and the  $S_1/T_1-2$  crossing point (b); the  $S_1-2$  minimum and the  $S_1/T_1$  crossing point (c); the  $S_1-2$  minimum and the  $S_1/T_1-2$  crossing point (d).

## Discussion on the active space choice

A series of active spaces have been tested previously at the FC region and shown in Figs. 2 and S9. Only the active space (14e,11o) in Fig. 2, which includes five  $\pi$  and four  $\pi^*$  orbitals on the aromatic ring and nitro group and two non-bonding n orbitals of the oxygen atoms, can give the reasonable vertical excitation energies and also the correct properties of electronic states in comparison to the experiments as well as TD-MN15 calculations. We finally employed this active space and denoted it as (I), to make a good balance between computational accuracy and efficiency. In contrast, the active spaces (II, III and IV) including the bonding  $\pi$  orbital of  $\text{NO}_2$  group cannot give the correct electronic configurations of the  $S_1$  state (see Table S1 and Fig. S9).

When we simulated the photodegradation reaction and performed CASSCF(14,11) and MS-CASPT2 calculations along the reaction path of the cleavage of the  $\text{C}_2\text{-N}_{10}$  bond, the  $\sigma$  and  $\sigma^*$  orbitals of the C-N bond are involved in the active space. It is reasonable because the energy of the  $\sigma$  orbital increase and that of the  $\sigma^*$  orbital decreases with the bond elongation. The updated active space (14e,11o) is shown in Fig. S10 and applied in the CASSCF and MS-CASPT2 calculations in Section 3.2. However, compared with photochemical reactions, the change on the geometry of 2-NF is not so large during the whole photophysical process. Therefore, the active space shown in Fig. 2 was applied to all the calculations in Section 3.1.

## Discussion on comparison between CASPT2 and CASSCF results

The PESs scanned along the selected reaction coordinates at the CASSCF level were reported in Figs. S13 and S15. On one hand, the SA5-CASSCF calculations can provide at least qualitatively correct results in comparison with the MS-CASPT2. On the other hand, the influence of dynamical correlation is remarkable when the molecular structure changes along the selected reaction coordinate during photochemical processes. For example, the scanned PES along the  $\text{C}_2\text{-N}_{10}$  cleavage at the MS-CASPT2 level is smoother than that at the CASSCF level; The PESs along the rotation of the  $\text{C}_3\text{-C}_2\text{-N}_{10}\text{-O}_{12}$  dihedral angle in the lowest three excited states,  $T_1$  state in particular, were underestimated at the CASSCF level.

## Discussion on resonant structure of the nitro group

On account of the resonant structure of the nitro group, there would be some additional minimum and intersection structures due to the asymmetry in two N-O bond lengths. We have located two  $S_1$  minimum structures in acetonitrile solution. As shown in Figs. 3 and S17, the  $N_{10}-O_{11}$  and  $N_{10}-O_{12}$  bond lengths of the minimum structure S1 are computed as 1.234 and 1.361 Å, respectively. In another optimized minimum structure denoted as S1-2, the  $N_{10}-O_{11}$  bond is elongated to 1.388 Å and the  $N_{10}-O_{12}$  bond is shortened to 1.222 Å. The adiabatic excitation energies of the two  $S_1$  minima are calculated as 71.2 and 72.4 kcal/mol. The differences between other critical structures such as T2, T2T1, S1T1, S1T2 and their corresponding resonant geometries are found to be small in structures and energies. As shown in Fig. S18, the influence of the resonant structure on the LIIC path connecting  $S_1$  minima and S1T1 is insignificant and suggests the same deactivation process. The small difference on the curves may originate from the flip of two N-O bonds.

## Cartesian coordinates of all reported structures (Unit: Angstrom)

### I. gas phase

S0

|   |              |              |              |
|---|--------------|--------------|--------------|
| H | -0.932340599 | -2.427751773 | -0.875018172 |
| C | -4.122952760 | 1.099740450  | -0.000143439 |
| C | -4.496666554 | -0.244641690 | -0.000454108 |
| C | -3.524344445 | -1.251912973 | -0.000444858 |
| C | -2.195413496 | -0.896250314 | -0.000167871 |
| C | -1.817669943 | 0.448163144  | 0.000134268  |
| C | -2.774082371 | 1.459389756  | 0.000152980  |
| H | -4.879600024 | 1.863641296  | -0.000187392 |
| H | -5.538682800 | -0.509139947 | -0.000702462 |
| H | -3.820288398 | -2.286514964 | -0.000720882 |
| H | -2.488771842 | 2.496152928  | 0.000305552  |
| C | -0.968798890 | -1.784646457 | -0.000139782 |
| H | -0.932494457 | -2.427814714 | 0.874702581  |
| C | 0.157573670  | -0.775137527 | 0.000073788  |
| C | 1.527384572  | -1.005442875 | 0.000113032  |
| C | 2.366311151  | 0.103697658  | 0.000172009  |
| C | 1.874918163  | 1.403562694  | 0.000402688  |
| C | 0.513075708  | 1.614444305  | 0.000541010  |
| C | -0.345159856 | 0.516590578  | 0.000290571  |
| H | 1.936549760  | -1.995789185 | -0.000169702 |
| H | 2.558063433  | 2.228648362  | 0.000433761  |
| H | 0.129054028  | 2.617988232  | 0.000727719  |
| O | 4.521249997  | 0.868436445  | -0.005413298 |
| O | 4.215397755  | -1.238222422 | 0.005045239  |
| N | 3.806927234  | -0.103411887 | -0.000010420 |

**S1**

|   |              |              |              |
|---|--------------|--------------|--------------|
| C | -2.118195190 | -3.228322230 | -0.124932060 |
| C | -0.779561250 | -3.497411030 | 0.220119340  |
| C | 0.140881110  | -2.463316030 | 0.432558850  |
| C | -0.308095580 | -1.158533690 | 0.293009300  |
| C | -1.639760490 | -0.884571450 | -0.049749000 |
| C | -2.539344970 | -1.931028270 | -0.256922190 |
| C | -0.583256060 | 1.182761090  | 0.178030240  |
| C | -0.468701220 | 2.557049790  | 0.180657100  |
| C | -1.600814430 | 3.331158270  | -0.121371440 |
| C | -2.801216040 | 2.730010840  | -0.414341000 |
| C | -2.921706470 | 1.334066950  | -0.418013020 |
| C | -1.817852900 | 0.573036350  | -0.123261540 |
| H | 1.303617180  | 0.190994690  | -0.227724410 |
| H | -2.807210610 | -4.036209210 | -0.283421230 |
| H | 1.154781350  | -2.696079320 | 0.694588070  |
| H | -3.562833080 | -1.733195520 | -0.519898220 |
| C | 0.469298270  | 0.130464130  | 0.464944320  |
| H | 0.874395450  | 0.223788330  | 1.468292050  |
| H | 0.467411100  | 3.036016350  | 0.408951500  |
| H | -1.525169160 | 4.403907710  | -0.122681200 |
| H | -3.660356090 | 3.334799160  | -0.643891060 |
| H | -3.868045870 | 0.877933190  | -0.649273720 |
| O | 0.772079890  | -5.221142710 | 0.654431920  |
| O | -1.231357140 | -5.829782230 | 0.165738700  |
| N | -0.346092510 | -4.805593220 | 0.352671390  |

**S2**

|   |              |              |              |
|---|--------------|--------------|--------------|
| C | -2.126416000 | -3.234069000 | -0.134189000 |
|---|--------------|--------------|--------------|

|    |              |              |              |
|----|--------------|--------------|--------------|
| C  | -0.795645000 | -3.508861000 | 0.213087000  |
| C  | 0.119222000  | -2.473368000 | 0.426796000  |
| C  | -0.327441000 | -1.166074000 | 0.287864000  |
| C  | -1.654817000 | -0.888037000 | -0.055510000 |
| C  | -2.549487000 | -1.931330000 | -0.265026000 |
| C  | -0.592250000 | 1.176787000  | 0.176920000  |
| C  | -0.472532000 | 2.550389000  | 0.183242000  |
| C  | -1.601630000 | 3.330109000  | -0.116748000 |
| C  | -2.803937000 | 2.733832000  | -0.410333000 |
| C  | -2.929720000 | 1.337912000  | -0.417108000 |
| C  | -1.828924000 | 0.571908000  | -0.125735000 |
| H  | 1.289377000  | 0.177745000  | -0.233813000 |
| H  | -2.813813000 | -4.041603000 | -0.291755000 |
| H  | 1.136399000  | -2.689177000 | 0.690839000  |
| H  | -3.573358000 | -1.736497000 | -0.529478000 |
| C  | 0.456305000  | 0.119355000  | 0.460982000  |
| H  | 0.864725000  | 0.210622000  | 1.463371000  |
| H  | 0.465568000  | 3.025128000  | 0.412792000  |
| H  | -1.521796000 | 4.402602000  | -0.115805000 |
| H  | -3.660969000 | 3.342176000  | -0.638836000 |
| H  | -3.877642000 | 0.885810000  | -0.649959000 |
| O  | 0.870713000  | -5.111242000 | 0.668093000  |
| O  | -1.237970000 | -5.825504000 | 0.165262000  |
| N  | -0.377036000 | -4.845146000 | 0.343199000  |
| T1 |              |              |              |
| H  | -0.923266289 | -2.417924656 | -0.875386373 |
| C  | -4.144864561 | 1.095162512  | 0.000003270  |
| C  | -4.514469210 | -0.254192218 | 0.000334001  |

|    |              |              |              |
|----|--------------|--------------|--------------|
| C  | -3.540104275 | -1.258967281 | 0.000178100  |
| C  | -2.197254388 | -0.893147202 | -0.000251349 |
| C  | -1.828210572 | 0.461058193  | -0.000517213 |
| C  | -2.795297531 | 1.463530304  | -0.000429438 |
| H  | -4.905203736 | 1.855507074  | 0.000135882  |
| H  | -5.556226021 | -0.520799310 | 0.000746002  |
| H  | -3.831116460 | -2.294982239 | 0.000452891  |
| H  | -2.518744214 | 2.502962053  | -0.000621630 |
| C  | -0.964336539 | -1.775308611 | -0.000436211 |
| H  | -0.923233316 | -2.418518985 | 0.874061954  |
| C  | 0.160455580  | -0.760416557 | -0.000269388 |
| C  | 1.520173108  | -0.992805254 | 0.000145508  |
| C  | 2.374077621  | 0.103097847  | 0.000246380  |
| C  | 1.881449364  | 1.400646690  | -0.000159520 |
| C  | 0.512347666  | 1.614948849  | -0.000546540 |
| C  | -0.350366717 | 0.535381471  | -0.000539920 |
| H  | 1.917051071  | -1.989599742 | 0.000506862  |
| H  | 2.559600656  | 2.230895762  | -0.000131628 |
| H  | 0.139611008  | 2.623669220  | -0.000786601 |
| O  | 4.627705235  | 0.867187264  | 0.001639470  |
| O  | 4.298249349  | -1.294857585 | 0.000307611  |
| N  | 3.771212214  | -0.108748486 | 0.000840730  |
| T2 |              |              |              |
| H  | -0.941129138 | -2.429409347 | -0.874393044 |
| C  | -4.126249021 | 1.103020132  | -0.000491198 |
| C  | -4.506343968 | -0.244379356 | -0.000731021 |
| C  | -3.538939397 | -1.249789612 | -0.000392120 |
| C  | -2.198051599 | -0.892353484 | 0.000109069  |

|    |              |              |              |
|----|--------------|--------------|--------------|
| C  | -1.821374141 | 0.447991024  | 0.000278982  |
| C  | -2.779837332 | 1.456412854  | 0.000023628  |
| H  | -4.879772081 | 1.870066407  | -0.000779811 |
| H  | -5.549510084 | -0.504837704 | -0.001227321 |
| H  | -3.832834519 | -2.285003644 | -0.000583831 |
| H  | -2.492247981 | 2.492825382  | 0.000137089  |
| C  | -0.974812899 | -1.786397298 | 0.000392470  |
| H  | -0.941416777 | -2.429200587 | 0.875348506  |
| C  | 0.159580760  | -0.782812418 | 0.000483832  |
| C  | 1.507287669  | -1.014917042 | 0.000371033  |
| C  | 2.368176591  | 0.091980917  | 0.000228610  |
| C  | 1.869904897  | 1.398540421  | 0.000470222  |
| C  | 0.510294395  | 1.609754704  | 0.000605109  |
| C  | -0.357424708 | 0.522300056  | 0.000542989  |
| H  | 1.916732517  | -2.007142995 | 0.000235140  |
| H  | 2.542834844  | 2.235261173  | 0.000471873  |
| H  | 0.134303328  | 2.616966010  | 0.000721538  |
| O  | 4.614374403  | 0.897871475  | -0.002062310 |
| O  | 4.352539024  | -1.208325516 | -0.000665477 |
| N  | 3.733154231  | -0.134642441 | 0.000428829  |
| T3 |              |              |              |
| H  | -0.918716126 | -2.419281567 | -0.874104113 |
| C  | -4.139945869 | 1.095609608  | -0.000709251 |
| C  | -4.510095025 | -0.253363098 | -0.000881599 |
| C  | -3.536198158 | -1.258957550 | -0.000334001 |
| C  | -2.193353489 | -0.894109464 | 0.000265462  |
| C  | -1.823807431 | 0.460305163  | 0.000396618  |
| C  | -2.789984523 | 1.463196017  | -0.000031920 |



|      |              |              |              |
|------|--------------|--------------|--------------|
| H    | -4.899743574 | 1.856477003  | -0.001113680 |
| H    | -5.552008902 | -0.519316126 | -0.001430678 |
| H    | -3.828181728 | -2.294708056 | -0.000402291 |
| H    | -2.512660210 | 2.502407740  | 0.000149731  |
| C    | -0.960158457 | -1.776405310 | 0.000593599  |
| H    | -0.918971915 | -2.419091396 | 0.875449256  |
| C    | 0.164709234  | -0.761052035 | 0.000609570  |
| C    | 1.523769561  | -0.995028820 | 0.000216142  |
| C    | 2.381415352  | 0.101114178  | 0.000115578  |
| C    | 1.885385427  | 1.400215632  | 0.000557038  |
| C    | 0.516782918  | 1.612745778  | 0.000775832  |
| C    | -0.346577167 | 0.534098740  | 0.000689370  |
| H    | 1.914864219  | -1.993831583 | -0.000072571 |
| H    | 2.558614153  | 2.234063513  | 0.000676670  |
| H    | 0.144891980  | 2.621742432  | 0.001077082  |
| O    | 4.586526450  | 0.924877485  | -0.003925860 |
| O    | 4.242931287  | -1.338140215 | 0.001465048  |
| N    | 3.779751056  | -0.109788928 | -0.000508248 |
| S1S0 |              |              |              |
| H    | -0.935835778 | -2.420419816 | -0.875364836 |
| C    | -4.152090968 | 1.095550960  | -0.000035121 |
| C    | -4.523333288 | -0.252029730 | -0.000094061 |
| C    | -3.550961378 | -1.257649889 | -0.000282792 |
| C    | -2.207276941 | -0.893345427 | -0.000244702 |
| C    | -1.835694101 | 0.459348141  | -0.000197669 |
| C    | -2.802165384 | 1.463276076  | 0.000021807  |
| H    | -4.911288613 | 1.856992014  | 0.000051669  |
| H    | -5.565421582 | -0.517116670 | 0.000023421  |

|      |              |              |              |
|------|--------------|--------------|--------------|
| H    | -3.842859671 | -2.293340959 | -0.000352750 |
| H    | -2.525243500 | 2.502505183  | 0.000298938  |
| C    | -0.976765479 | -1.778095698 | -0.000279623 |
| H    | -0.936096159 | -2.420828426 | 0.874453355  |
| C    | 0.150243142  | -0.765993926 | -0.000067661 |
| C    | 1.506466719  | -0.999336804 | 0.000504100  |
| C    | 2.355846470  | 0.107640018  | 0.000418452  |
| C    | 1.865849574  | 1.412095704  | 0.000052828  |
| C    | 0.498605208  | 1.618597298  | -0.000006990 |
| C    | -0.360846014 | 0.533369359  | 0.000003080  |
| H    | 1.912688036  | -1.994199885 | 0.000820902  |
| H    | 2.548632135  | 2.240836643  | -0.000086388 |
| H    | 0.119793050  | 2.624731083  | -0.000111408 |
| O    | 4.752178625  | 0.680698709  | -0.001928412 |
| O    | 4.479811555  | -1.136168414 | 0.000499400  |
| N    | 3.705003367  | -0.093336447 | 0.001427281  |
| S2S1 |              |              |              |
| H    | -0.922618385 | -2.420716732 | -0.874712233 |
| C    | -4.127939726 | 1.092527484  | -0.000282157 |
| C    | -4.493002156 | -0.251657205 | -0.000182937 |
| C    | -3.515721576 | -1.250918183 | -0.000050166 |
| C    | -2.190045776 | -0.892021960 | -0.000014288 |
| C    | -1.816257527 | 0.458759082  | -0.000113445 |
| C    | -2.780464746 | 1.460366856  | -0.000248047 |
| H    | -4.888627825 | 1.852629742  | -0.000384495 |
| H    | -5.533445358 | -0.522910171 | -0.000207803 |
| H    | -3.807032709 | -2.287214203 | 0.000024787  |
| H    | -2.502822250 | 2.499529063  | -0.000320073 |

|   |              |              |              |
|---|--------------|--------------|--------------|
| C | -0.959708927 | -1.777883773 | 0.000121182  |
| H | -0.922704345 | -2.420569901 | 0.875066570  |
| C | 0.169412450  | -0.766587182 | 0.000089833  |
| C | 1.519282487  | -1.002880281 | 0.000141476  |
| C | 2.390881190  | 0.097477720  | 0.000103354  |
| C | 1.883374278  | 1.405259210  | 0.000015976  |
| C | 0.523302032  | 1.614544187  | -0.000097295 |
| C | -0.346060865 | 0.532819867  | -0.000049298 |
| H | 1.906978007  | -2.000491819 | 0.000184974  |
| H | 2.553640310  | 2.238352796  | 0.000064062  |
| H | 0.151842840  | 2.623721286  | -0.000182227 |
| O | 4.498734463  | 0.983917452  | 0.002304969  |
| O | 4.141171946  | -1.371979639 | -0.002058404 |
| N | 3.837071202  | -0.120294588 | 0.000308500  |

T2T1

|   |              |              |              |
|---|--------------|--------------|--------------|
| H | -0.937943078 | -2.425628137 | -0.875034815 |
| C | -4.134204190 | 1.095122972  | -0.000051193 |
| C | -4.502041969 | -0.249360798 | 0.000022262  |
| C | -3.527871565 | -1.249818971 | -0.000009668 |
| C | -2.200839929 | -0.893404663 | -0.000111148 |
| C | -1.823435811 | 0.456368916  | -0.000191102 |
| C | -2.786709820 | 1.460573753  | -0.000157578 |
| H | -4.893676716 | 1.856316763  | -0.000029242 |
| H | -5.543077982 | -0.518082106 | 0.000107910  |
| H | -3.820850215 | -2.285554814 | 0.000039540  |
| H | -2.507359183 | 2.499178240  | -0.000223001 |
| C | -0.973724191 | -1.783069218 | -0.000129961 |
| H | -0.937900627 | -2.425598255 | 0.874794663  |

|   |              |              |              |
|---|--------------|--------------|--------------|
| C | 0.159111502  | -0.776684868 | -0.000166903 |
| C | 1.505011482  | -1.009209505 | -0.000076138 |
| C | 2.366241782  | 0.103555156  | 0.000017378  |
| C | 1.864935944  | 1.417286753  | -0.000166648 |
| C | 0.509040076  | 1.621354735  | -0.000300562 |
| C | -0.356325723 | 0.529494697  | -0.000234029 |
| H | 1.910929390  | -2.003759213 | -0.000064819 |
| H | 2.546890644  | 2.246177475  | -0.000151678 |
| H | 0.127050621  | 2.626351561  | -0.000425691 |
| O | 4.649940559  | 0.777261925  | 0.000783780  |
| O | 4.356953315  | -1.199104057 | 0.000787612  |
| N | 3.719094727  | -0.095989218 | 0.000493802  |

T3T2

|   |              |              |              |
|---|--------------|--------------|--------------|
| C | -2.159594840 | -3.237434860 | -0.133267030 |
| C | -0.792908180 | -3.522723150 | 0.213498110  |
| C | 0.150078190  | -2.483697230 | 0.429165050  |
| C | -0.283333140 | -1.187245560 | 0.296320540  |
| C | -1.643829550 | -0.887162950 | -0.048994810 |
| C | -2.570489360 | -1.963427920 | -0.260155490 |
| C | -0.567101950 | 1.155919240  | 0.181926930  |
| C | -0.459220200 | 2.511922310  | 0.184020320  |
| C | -1.591728620 | 3.295873540  | -0.112963660 |
| C | -2.820087050 | 2.676415350  | -0.408310530 |
| C | -2.942046810 | 1.316169520  | -0.414038880 |
| C | -1.809277910 | 0.523020120  | -0.116550720 |
| H | 1.322400310  | 0.171632540  | -0.230121060 |
| H | -2.834887780 | -4.055436030 | -0.286420390 |
| H | 1.162528330  | -2.724945020 | 0.686753030  |

|   |              |              |              |
|---|--------------|--------------|--------------|
| H | -3.592291600 | -1.753492580 | -0.518948260 |
| C | 0.491116120  | 0.105505580  | 0.465478820  |
| H | 0.899007320  | 0.203154630  | 1.467149960  |
| H | 0.477375640  | 2.992159540  | 0.409142210  |
| H | -1.518608670 | 4.367494960  | -0.114149460 |
| H | -3.674800410 | 3.289549370  | -0.632786830 |
| H | -3.886670380 | 0.855451090  | -0.641310700 |
| O | 0.782426520  | -5.148850960 | 0.638941470  |
| O | -1.187193350 | -5.794190380 | 0.159337430  |
| N | -0.389395870 | -4.857613840 | 0.339773580  |

SOT1

|   |              |              |              |
|---|--------------|--------------|--------------|
| H | 0.852189000  | 0.231989000  | 1.483035000  |
| C | -2.784702000 | 2.757209000  | -0.433424000 |
| C | -1.566470000 | 3.347656000  | -0.128923000 |
| C | -0.461117000 | 2.565799000  | 0.179089000  |
| C | -0.591394000 | 1.190953000  | 0.178404000  |
| C | -1.815835000 | 0.598924000  | -0.127526000 |
| C | -2.918596000 | 1.376731000  | -0.435118000 |
| H | -3.632282000 | 3.375404000  | -0.669872000 |
| H | -1.478184000 | 4.419413000  | -0.131577000 |
| H | 0.480882000  | 3.030182000  | 0.414428000  |
| H | -3.866456000 | 0.926516000  | -0.671869000 |
| C | 0.455008000  | 0.135837000  | 0.476660000  |
| H | 1.295245000  | 0.193229000  | -0.209218000 |
| C | -0.323642000 | -1.153019000 | 0.302612000  |
| C | 0.120202000  | -2.451839000 | 0.447658000  |
| C | -0.816148000 | -3.499241000 | 0.227337000  |
| C | -2.163887000 | -3.223268000 | -0.128726000 |

|   |              |              |              |
|---|--------------|--------------|--------------|
| C | -2.575143000 | -1.905313000 | -0.265712000 |
| C | -1.659809000 | -0.867711000 | -0.052073000 |
| H | 1.133233000  | -2.685488000 | 0.717443000  |
| H | -2.846288000 | -4.036430000 | -0.287160000 |
| H | -3.594562000 | -1.697252000 | -0.535075000 |
| O | -1.018340000 | -5.904459000 | 0.230791000  |
| O | 0.699881000  | -5.324192000 | 0.664053000  |
| N | -0.421059000 | -4.766645000 | 0.353732000  |

S1T1

|   |              |              |              |
|---|--------------|--------------|--------------|
| H | -0.927972765 | -2.421624753 | -0.874930112 |
| C | -4.142006199 | 1.096394600  | -0.000154202 |
| C | -4.513402939 | -0.251457430 | -0.000267520 |
| C | -3.540500295 | -1.257167899 | -0.000249258 |
| C | -2.198826409 | -0.894185956 | -0.000127362 |
| C | -1.826800732 | 0.458487863  | -0.000019950 |
| C | -2.793532323 | 1.463227408  | -0.000029009 |
| H | -4.901334345 | 1.857754257  | -0.000178259 |
| H | -5.555419073 | -0.516735847 | -0.000368821 |
| H | -3.832964337 | -2.292754397 | -0.000347421 |
| H | -2.515686983 | 2.502227444  | 0.000036392  |
| C | -0.967976929 | -1.778927411 | -0.000080329 |
| H | -0.928095126 | -2.421682407 | 0.874732945  |
| C | 0.158582790  | -0.766250154 | 0.000045530  |
| C | 1.516411759  | -0.997914164 | 0.000009091  |
| C | 2.365658099  | 0.104105998  | 0.000137771  |
| C | 1.876246938  | 1.404419041  | 0.000251952  |
| C | 0.508359215  | 1.615789764  | 0.000116980  |
| C | -0.351955148 | 0.532148468  | 0.000067761  |

|   |             |              |              |
|---|-------------|--------------|--------------|
| H | 1.918963999 | -1.993439135 | -0.000270140 |
| H | 2.556497074 | 2.234331922  | 0.000518509  |
| H | 0.132075751 | 2.622923688  | 0.000172612  |
| O | 4.648386556 | 0.821130788  | -0.002635483 |
| O | 4.339551914 | -1.243050069 | 0.002869099  |
| N | 3.744978549 | -0.103972508 | 0.000222059  |

S1T2

|   |              |              |              |
|---|--------------|--------------|--------------|
| H | -0.942918037 | -2.429831255 | -0.874903171 |
| C | -4.125789790 | 1.093547939  | -0.000253180 |
| C | -4.491329977 | -0.247419146 | -0.000170141 |
| C | -3.514085222 | -1.244971829 | -0.000064671 |
| C | -2.200686070 | -0.894723124 | -0.000064422 |
| C | -1.816778861 | 0.455786963  | -0.000099469 |
| C | -2.779940511 | 1.458632027  | -0.000208358 |
| H | -4.885403585 | 1.854758796  | -0.000363143 |
| H | -5.531481428 | -0.519187489 | -0.000190689 |
| H | -3.807774266 | -2.280846443 | 0.000004800  |
| H | -2.500157123 | 2.497165520  | -0.000275431 |
| C | -0.975388782 | -1.787264011 | 0.000004932  |
| H | -0.942967076 | -2.429736146 | 0.874986554  |
| C | 0.161930821  | -0.784765606 | 0.000003662  |
| C | 1.497689129  | -1.017337715 | 0.000009388  |
| C | 2.373147741  | 0.102414689  | 0.000099951  |
| C | 1.858243815  | 1.426304822  | 0.000124838  |
| C | 0.512674089  | 1.626904789  | 0.000027401  |
| C | -0.361171177 | 0.528639256  | -0.000021590 |
| H | 1.902789479  | -2.012142365 | -0.000145540 |
| H | 2.539375523  | 2.255692675  | 0.000323592  |

|      |              |              |              |
|------|--------------|--------------|--------------|
| H    | 0.128490687  | 2.631187072  | 0.000071439  |
| O    | 4.627049785  | 0.793897168  | 0.000287608  |
| O    | 4.328930183  | -1.210139895 | 0.000150429  |
| N    | 3.714789690  | -0.092787569 | 0.000188048  |
| S1T3 |              |              |              |
| C    | -2.133032830 | -3.264719860 | -0.124545180 |
| C    | -0.787257490 | -3.529322320 | 0.217866410  |
| C    | 0.143192540  | -2.516814890 | 0.429880110  |
| C    | -0.308654740 | -1.163238770 | 0.289125900  |
| C    | -1.689782240 | -0.890910680 | -0.061673760 |
| C    | -2.565193460 | -1.885291900 | -0.260490630 |
| C    | -0.575151180 | 1.175407770  | 0.175346870  |
| C    | -0.446282400 | 2.523816560  | 0.180651100  |
| C    | -1.579406650 | 3.332968280  | -0.118295420 |
| C    | -2.827505210 | 2.718833160  | -0.417710950 |
| C    | -2.958299670 | 1.366999060  | -0.423605410 |
| C    | -1.828053470 | 0.563638010  | -0.125396660 |
| H    | 1.307905180  | 0.176625320  | -0.235183890 |
| H    | -2.816437960 | -4.071787890 | -0.278530710 |
| H    | 1.156524290  | -2.746045600 | 0.688360660  |
| H    | -3.590103190 | -1.694380950 | -0.520680620 |
| C    | 0.472441060  | 0.113799090  | 0.458375230  |
| H    | 0.884490510  | 0.210891500  | 1.460252430  |
| H    | 0.495475310  | 2.992647200  | 0.406404160  |
| H    | -1.493937350 | 4.402870720  | -0.118101660 |
| H    | -3.674301100 | 3.342618050  | -0.641425920 |
| H    | -3.904455150 | 0.909958170  | -0.650786010 |
| O    | 0.793774160  | -5.124671140 | 0.646189540  |



|                   |              |              |              |
|-------------------|--------------|--------------|--------------|
| O                 | -1.181910160 | -5.782205820 | 0.166877240  |
| N                 | -0.369150320 | -4.903948990 | 0.350829770  |
| TS-1(MN15/6-31G*) |              |              |              |
| C                 | 1.865806000  | 1.561088000  | -0.125343000 |
| C                 | 2.442853000  | 0.248014000  | -0.021775000 |
| C                 | 1.612059000  | -0.922287000 | 0.010719000  |
| C                 | 0.256250000  | -0.748202000 | 0.014348000  |
| C                 | -0.315049000 | 0.558144000  | -0.048994000 |
| C                 | 0.501157000  | 1.707686000  | -0.125827000 |
| C                 | -2.097479000 | -0.935063000 | 0.034462000  |
| C                 | -3.429637000 | -1.326446000 | 0.059235000  |
| C                 | -4.422569000 | -0.343151000 | 0.018172000  |
| C                 | -4.088036000 | 1.016120000  | -0.047211000 |
| C                 | -2.756075000 | 1.416853000  | -0.072927000 |
| C                 | -1.760043000 | 0.433538000  | -0.032297000 |
| H                 | -0.785601000 | -2.390328000 | 0.979198000  |
| H                 | 2.545119000  | 2.404958000  | -0.185372000 |
| H                 | 2.102722000  | -1.890949000 | 0.036560000  |
| H                 | 0.052890000  | 2.695952000  | -0.192249000 |
| C                 | -0.846339000 | -1.781099000 | 0.068355000  |
| H                 | -0.794742000 | -2.475032000 | -0.780432000 |
| H                 | -3.699742000 | -2.378671000 | 0.110085000  |
| H                 | -5.469010000 | -0.636169000 | 0.037495000  |
| H                 | -4.877657000 | 1.762097000  | -0.077688000 |
| H                 | -2.494076000 | 2.471325000  | -0.122954000 |
| O                 | 3.688303000  | 0.222826000  | 1.164879000  |
| O                 | 4.404166000  | -0.901510000 | -0.751371000 |
| N                 | 3.843280000  | 0.079302000  | -0.214028000 |

**TS-2(MN15/6-31G\*)**

|   |              |              |              |
|---|--------------|--------------|--------------|
| H | -0.717642000 | -2.510335000 | -0.572241000 |
| C | -4.042066000 | 1.019870000  | -0.234112000 |
| C | -4.384655000 | -0.336675000 | -0.139665000 |
| C | -3.398067000 | -1.318067000 | 0.013654000  |
| C | -2.068479000 | -0.929714000 | 0.071331000  |
| C | -1.718720000 | 0.439620000  | -0.025315000 |
| C | -2.712619000 | 1.420791000  | -0.177830000 |
| H | -4.825909000 | 1.763271000  | -0.352579000 |
| H | -5.430322000 | -0.629143000 | -0.185557000 |
| H | -3.674690000 | -2.367331000 | 0.087021000  |
| H | -2.445386000 | 2.472429000  | -0.251631000 |
| C | -0.825874000 | -1.774659000 | 0.234644000  |
| H | -0.832899000 | -2.336656000 | 1.177135000  |
| C | 0.286375000  | -0.747126000 | 0.207478000  |
| C | 1.623094000  | -0.926749000 | 0.317875000  |
| C | 2.522853000  | 0.250916000  | 0.291700000  |
| C | 1.884623000  | 1.587141000  | 0.149785000  |
| C | 0.538014000  | 1.724970000  | 0.041796000  |
| C | -0.290569000 | 0.566170000  | 0.058062000  |
| H | 2.098182000  | -1.894211000 | 0.452798000  |
| H | 2.566567000  | 2.431573000  | 0.161224000  |
| H | 0.088126000  | 2.711904000  | -0.043228000 |
| O | 3.693155000  | 0.172773000  | 0.992133000  |
| O | 4.112501000  | -0.964058000 | -1.082026000 |
| N | 3.749324000  | 0.118550000  | -0.658603000 |

**INT(MN15/6-31G\*)**

|   |              |              |             |
|---|--------------|--------------|-------------|
| H | -0.866798000 | -2.278220000 | 1.167265000 |
|---|--------------|--------------|-------------|

|   |              |              |              |
|---|--------------|--------------|--------------|
| C | -4.127791000 | 1.009402000  | -0.295772000 |
| C | -4.434856000 | 0.039180000  | 0.667952000  |
| C | -3.425678000 | -0.728550000 | 1.259833000  |
| C | -2.109066000 | -0.515534000 | 0.878615000  |
| C | -1.796567000 | 0.462724000  | -0.094090000 |
| C | -2.811223000 | 1.230465000  | -0.685248000 |
| H | -4.928081000 | 1.593942000  | -0.741884000 |
| H | -5.470127000 | -0.118151000 | 0.958794000  |
| H | -3.673687000 | -1.479046000 | 2.006972000  |
| H | -2.572224000 | 1.983232000  | -1.433086000 |
| C | -0.848042000 | -1.197659000 | 1.357497000  |
| H | -0.694915000 | -1.068459000 | 2.436358000  |
| C | 0.233757000  | -0.507907000 | 0.553598000  |
| C | 1.574215000  | -0.708989000 | 0.567111000  |
| C | 2.426961000  | 0.108740000  | -0.309225000 |
| C | 1.779930000  | 1.109332000  | -1.176273000 |
| C | 0.428130000  | 1.276550000  | -1.163000000 |
| C | -0.370460000 | 0.477190000  | -0.302872000 |
| H | 2.072665000  | -1.443994000 | 1.192765000  |
| H | 2.438562000  | 1.697228000  | -1.807529000 |
| H | -0.039543000 | 2.021004000  | -1.803489000 |
| O | 3.732139000  | 0.494500000  | 0.249306000  |
| O | 4.051477000  | -1.659607000 | -0.621739000 |
| N | 3.650029000  | -0.495476000 | -0.794977000 |

Free Radical(MN15/6-31G\*)

|   |              |              |              |
|---|--------------|--------------|--------------|
| H | -0.749901000 | -2.155863000 | 1.263222000  |
| C | -4.173050000 | 0.829445000  | -0.448024000 |
| C | -4.467051000 | -0.137814000 | 0.522380000  |

|   |              |              |              |
|---|--------------|--------------|--------------|
| C | -3.445065000 | -0.818072000 | 1.191554000  |
| C | -2.124869000 | -0.516454000 | 0.883662000  |
| C | -1.828148000 | 0.461322000  | -0.089996000 |
| C | -2.853435000 | 1.136493000  | -0.764061000 |
| H | -4.984536000 | 1.344771000  | -0.954994000 |
| H | -5.504373000 | -0.361379000 | 0.757758000  |
| H | -3.684118000 | -1.566379000 | 1.943760000  |
| H | -2.622263000 | 1.890899000  | -1.512760000 |
| C | -0.848070000 | -1.080414000 | 1.461914000  |
| H | -0.796615000 | -0.954447000 | 2.550875000  |
| C | 0.223186000  | -0.282879000 | 0.750159000  |
| C | 1.580350000  | -0.303344000 | 0.910217000  |
| C | 2.413810000  | 0.602994000  | 0.132293000  |
| C | 1.751438000  | 1.465881000  | -0.841386000 |
| C | 0.388762000  | 1.468521000  | -0.990488000 |
| C | -0.388686000 | 0.607306000  | -0.183135000 |
| H | 2.086979000  | -0.957754000 | 1.614995000  |
| H | 2.399129000  | 2.113010000  | -1.425671000 |
| H | -0.094860000 | 2.128213000  | -1.707962000 |
| O | 3.653691000  | 0.642891000  | 0.287523000  |
| O | 3.965429000  | -2.114494000 | -0.844530000 |
| N | 4.102133000  | -1.367579000 | -1.718251000 |

## II. QM/MM

S0

|   |              |              |              |
|---|--------------|--------------|--------------|
| C | -2.989498215 | -2.913140214 | -0.274237018 |
| C | -1.729723124 | -3.423861247 | 0.022040000  |
| C | -0.625610045 | -2.601629188 | 0.239364015  |

|    |              |              |              |
|----|--------------|--------------|--------------|
| C  | -0.814396060 | -1.231548089 | 0.128129010  |
| C  | -2.080395149 | -0.705479053 | -0.162335011 |
| C  | -3.168652231 | -1.548747113 | -0.356443026 |
| C  | -0.641371044 | 1.119771079  | 0.015737001  |
| C  | -0.258447020 | 2.450149179  | -0.017723003 |
| C  | -1.229437090 | 3.420525250  | -0.294768021 |
| C  | -2.538259186 | 3.063863224  | -0.526678040 |
| C  | -2.927619212 | 1.718979127  | -0.490881035 |
| C  | -1.975733145 | 0.764013057  | -0.225923019 |
| H  | 1.005915075  | -0.216391018 | -0.449265034 |
| H  | -3.808271275 | -3.585750257 | -0.432039034 |
| H  | 0.329590022  | -3.029350220 | 0.473378032  |
| H  | -4.141213301 | -1.150361086 | -0.580489043 |
| C  | 0.199798014  | -0.115912006 | 0.271587020  |
| H  | 0.648824045  | -0.106526010 | 1.260495090  |
| H  | 0.762715054  | 2.743480198  | 0.147449012  |
| H  | -0.943850067 | 4.456283324  | -0.334267023 |
| H  | -3.271358238 | 3.822088278  | -0.737257051 |
| H  | -3.953772285 | 1.451389104  | -0.672111051 |
| O  | -0.552105039 | -5.286996385 | 0.617537043  |
| O  | -2.439939175 | -5.564045403 | -0.330440023 |
| N  | -1.562346111 | -4.863258354 | 0.111232010  |
| S1 |              |              |              |
| C  | -2.113399151 | -3.231683232 | -0.147664011 |
| C  | -0.780360057 | -3.499366252 | 0.215255017  |
| C  | 0.137348008  | -2.463134178 | 0.431061029  |
| C  | -0.313096022 | -1.158906087 | 0.288601021  |
| C  | -1.644029118 | -0.885870063 | -0.054293004 |

|    |              |              |              |
|----|--------------|--------------|--------------|
| C  | -2.537925185 | -1.932315141 | -0.276830018 |
| C  | -0.585572044 | 1.182767086  | 0.178834012  |
| C  | -0.466717035 | 2.556611186  | 0.179012011  |
| C  | -1.598391115 | 3.333961240  | -0.116767008 |
| C  | -2.801654204 | 2.735608200  | -0.401459029 |
| C  | -2.925747211 | 1.338893096  | -0.403769030 |
| C  | -1.822917132 | 0.575557042  | -0.116816010 |
| H  | 1.293275091  | 0.185469011  | -0.244326020 |
| H  | -2.799715203 | -4.040587295 | -0.313164021 |
| H  | 1.149936082  | -2.693773193 | 0.698840053  |
| H  | -3.559466256 | -1.736576128 | -0.548996038 |
| C  | 0.466448033  | 0.127877010  | 0.456972035  |
| H  | 0.882389066  | 0.218561015  | 1.455837104  |
| H  | 0.472136032  | 3.033108220  | 0.401015028  |
| H  | -1.519445109 | 4.406551320  | -0.119761008 |
| H  | -3.660855268 | 3.341895242  | -0.626839043 |
| H  | -3.874463279 | 0.885547063  | -0.631187044 |
| O  | 0.768955054  | -5.215854378 | 0.686708051  |
| O  | -1.213569086 | -5.840645425 | 0.197837016  |
| N  | -0.350273026 | -4.802895348 | 0.370414025  |
| S2 |              |              |              |
| C  | -2.123382154 | -3.236540232 | -0.152127013 |
| C  | -0.796465058 | -3.510283253 | 0.208353016  |
| C  | 0.118984007  | -2.473781177 | 0.426335032  |
| C  | -0.329846022 | -1.165567084 | 0.285450019  |
| C  | -1.656460121 | -0.888368065 | -0.056654002 |
| C  | -2.550244183 | -1.937798142 | -0.280504022 |
| C  | -0.594010045 | 1.177050087  | 0.178590014  |

|    |              |              |              |
|----|--------------|--------------|--------------|
| C  | -0.470880035 | 2.551340183  | 0.180292012  |
| C  | -1.599422116 | 3.332639244  | -0.114835009 |
| C  | -2.804197202 | 2.737599198  | -0.400496027 |
| C  | -2.932384210 | 1.341203098  | -0.404322031 |
| C  | -1.831617134 | 0.574180043  | -0.117747007 |
| H  | 1.282185092  | 0.175096015  | -0.245201020 |
| H  | -2.807758205 | -4.045462293 | -0.316699021 |
| H  | 1.134820081  | -2.688971195 | 0.693816049  |
| H  | -3.572591260 | -1.745292127 | -0.551945042 |
| C  | 0.454821035  | 0.118260008  | 0.455881035  |
| H  | 0.870989064  | 0.207574015  | 1.454994103  |
| H  | 0.469569036  | 3.024513218  | 0.403213029  |
| H  | -1.517263110 | 4.405059321  | -0.116591009 |
| H  | -3.661799267 | 3.346448241  | -0.625617046 |
| H  | -3.882151282 | 0.890411065  | -0.632534048 |
| O  | 0.867934060  | -5.103180370 | 0.696512049  |
| O  | -1.233620088 | -5.826920419 | 0.182169014  |
| N  | -0.378287029 | -4.845742349 | 0.357819025  |
| T1 |              |              |              |
| C  | -2.128703153 | -3.227683234 | -0.149252009 |
| C  | -0.802853059 | -3.498440255 | 0.211314017  |
| C  | 0.112851007  | -2.469792181 | 0.425974033  |
| C  | -0.330437023 | -1.160462085 | 0.283088021  |
| C  | -1.658155118 | -0.882403063 | -0.059878004 |
| C  | -2.552896187 | -1.925078139 | -0.281068019 |
| C  | -0.590326040 | 1.182190087  | 0.173873012  |
| C  | -0.467356032 | 2.558290186  | 0.174104014  |
| C  | -1.596221118 | 3.338038244  | -0.122249009 |

|    |              |              |              |
|----|--------------|--------------|--------------|
| C  | -2.801510204 | 2.742668197  | -0.407821030 |
| C  | -2.930286213 | 1.347424095  | -0.410237032 |
| C  | -1.831779131 | 0.579711041  | -0.122967008 |
| H  | 1.284078091  | 0.176424012  | -0.249121017 |
| H  | -2.810199205 | -4.039557294 | -0.309935024 |
| H  | 1.126828081  | -2.693723196 | 0.693894050  |
| H  | -3.574637260 | -1.728866126 | -0.552515040 |
| C  | 0.456799031  | 0.122059008  | 0.452096031  |
| H  | 0.873209063  | 0.211267016  | 1.451007107  |
| H  | 0.472749036  | 3.031948221  | 0.396869030  |
| H  | -1.514487109 | 4.410481319  | -0.125136010 |
| H  | -3.658607265 | 3.351873244  | -0.633784044 |
| H  | -3.880578282 | 0.897440063  | -0.638221048 |
| O  | 0.822940061  | -5.157579373 | 0.699488052  |
| O  | -1.188918088 | -5.843341424 | 0.205064016  |
| N  | -0.387606026 | -4.838546353 | 0.366015028  |
| T2 |              |              |              |
| C  | -2.154050156 | -3.223394231 | -0.147091013 |
| C  | -0.821025058 | -3.500773255 | 0.212035016  |
| C  | 0.105013008  | -2.475497177 | 0.423492033  |
| C  | -0.335011025 | -1.164219084 | 0.279927023  |
| C  | -1.661730118 | -0.881949066 | -0.059347006 |
| C  | -2.566558188 | -1.924014139 | -0.277815018 |
| C  | -0.588173040 | 1.178818084  | 0.169442010  |
| C  | -0.459706034 | 2.552032183  | 0.169024013  |
| C  | -1.586332113 | 3.336751242  | -0.124960011 |
| C  | -2.794403200 | 2.746061197  | -0.407596030 |
| C  | -2.928464213 | 1.350714096  | -0.409004027 |



|    |              |              |              |
|----|--------------|--------------|--------------|
| C  | -1.830341135 | 0.579850040  | -0.123441008 |
| H  | 1.281645093  | 0.166758012  | -0.258208017 |
| H  | -2.832766207 | -4.038951290 | -0.302858019 |
| H  | 1.121683081  | -2.696568196 | 0.689361049  |
| H  | -3.587237261 | -1.719109125 | -0.546613041 |
| C  | 0.456304033  | 0.115920007  | 0.445553030  |
| H  | 0.875632065  | 0.204278013  | 1.443312103  |
| H  | 0.482683037  | 3.022329218  | 0.389276030  |
| H  | -1.500329110 | 4.408778320  | -0.128318011 |
| H  | -3.649802263 | 3.358111244  | -0.631887045 |
| H  | -3.880657283 | 0.903781067  | -0.634430048 |
| O  | 0.829910061  | -5.133477371 | 0.707479052  |
| O  | -1.118068081 | -5.846634426 | 0.239756019  |
| N  | -0.438367030 | -4.822879351 | 0.361063024  |
| T3 |              |              |              |
| C  | -2.119114154 | -3.238213237 | -0.146216013 |
| C  | -0.790902056 | -3.507786256 | 0.211813015  |
| C  | 0.120607009  | -2.470243177 | 0.425214028  |
| C  | -0.329449023 | -1.164667086 | 0.283611023  |
| C  | -1.658504121 | -0.889876067 | -0.056641005 |
| C  | -2.547462187 | -1.936109141 | -0.275882018 |
| C  | -0.595900044 | 1.177689085  | 0.174774011  |
| C  | -0.476473037 | 2.554009184  | 0.174633011  |
| C  | -1.608008118 | 3.330880243  | -0.119270006 |
| C  | -2.812229203 | 2.732191197  | -0.402132031 |
| C  | -2.937373214 | 1.336478095  | -0.404328027 |
| C  | -1.836712132 | 0.571541042  | -0.119514010 |
| H  | 1.280097091  | 0.176497012  | -0.252106016 |

|      |              |              |              |
|------|--------------|--------------|--------------|
| H    | -2.802491203 | -4.048145295 | -0.308264020 |
| H    | 1.137299081  | -2.684045195 | 0.690522048  |
| H    | -3.570860257 | -1.745857124 | -0.545404041 |
| C    | 0.454534030  | 0.120263007  | 0.450939033  |
| H    | 0.872550063  | 0.210351015  | 1.449056105  |
| H    | 0.462915034  | 3.030091222  | 0.395242027  |
| H    | -1.529082109 | 4.403532316  | -0.122428009 |
| H    | -3.671514268 | 3.339055243  | -0.626170046 |
| H    | -3.887068281 | 0.884157063  | -0.630351044 |
| O    | 0.872707064  | -5.093003371 | 0.703182053  |
| O    | -1.225897090 | -5.820101420 | 0.188729013  |
| N    | -0.368098028 | -4.844530353 | 0.361419028  |
| S1S0 |              |              |              |
| C    | -2.171808159 | -3.202377232 | -0.141456011 |
| C    | -0.816473060 | -3.504590253 | 0.227997018  |
| C    | 0.128753010  | -2.459116178 | 0.437078034  |
| C    | -0.310411024 | -1.156006084 | 0.287639019  |
| C    | -1.643059120 | -0.862380065 | -0.049573002 |
| C    | -2.564049185 | -1.913578139 | -0.266888021 |
| C    | -0.561121039 | 1.191321088  | 0.176018011  |
| C    | -0.430077030 | 2.562416186  | 0.174728015  |
| C    | -1.556888114 | 3.351332245  | -0.117325010 |
| C    | -2.765740198 | 2.763233200  | -0.396937029 |
| C    | -2.904074211 | 1.367711100  | -0.397373029 |
| C    | -1.807028130 | 0.592291045  | -0.113820010 |
| H    | 1.303446095  | 0.173321012  | -0.258865017 |
| H    | -2.860060206 | -4.010994290 | -0.300442024 |
| H    | 1.140716084  | -2.696102197 | 0.706067053  |

|   |              |              |              |
|---|--------------|--------------|--------------|
| H | -3.582605262 | -1.696576122 | -0.534507038 |
| C | 0.481623037  | 0.125483007  | 0.448608034  |
| H | 0.904713064  | 0.212386014  | 1.444521103  |
| H | 0.513963038  | 3.030718218  | 0.392344030  |
| H | -1.467887105 | 4.423066318  | -0.121073008 |
| H | -3.620342262 | 3.376930242  | -0.619957045 |
| H | -3.858365278 | 0.924097065  | -0.620465045 |
| O | 0.661655048  | -5.336660384 | 0.708352051  |
| O | -1.048585076 | -5.898830427 | 0.280749020  |
| N | -0.451940035 | -4.759775345 | 0.382370028  |

S2S1

|   |              |              |              |
|---|--------------|--------------|--------------|
| C | -2.007866147 | -3.347425245 | -0.218072018 |
| C | -0.692401051 | -3.606062260 | 0.191392012  |
| C | 0.194745012  | -2.566445188 | 0.460560031  |
| C | -0.272057019 | -1.259204093 | 0.348242028  |
| C | -1.586617117 | -0.989222073 | -0.041584002 |
| C | -2.455800178 | -2.030109144 | -0.334232023 |
| C | -0.557554040 | 1.080402081  | 0.266569017  |
| C | -0.442895031 | 2.457213177  | 0.291218020  |
| C | -1.549753111 | 3.229934232  | -0.029986003 |
| C | -2.755364202 | 2.630871190  | -0.370628025 |
| C | -2.872324206 | 1.249713093  | -0.399258027 |
| C | -1.766154130 | 0.481085033  | -0.081155004 |
| H | 1.347054100  | 0.106039008  | -0.089245007 |
| H | -2.665739192 | -4.162829303 | -0.430779031 |
| H | 1.208039088  | -2.770552203 | 0.733558055  |
| H | -3.468054252 | -1.844967133 | -0.644374045 |
| C | 0.489715036  | 0.029499002  | 0.572860042  |

|   |              |              |              |
|---|--------------|--------------|--------------|
| H | 0.859717065  | 0.109094007  | 1.591001118  |
| H | 0.487377035  | 2.929614210  | 0.555626041  |
| H | -1.474043108 | 4.302778312  | -0.014782000 |
| H | -3.604435263 | 3.243598234  | -0.615865044 |
| H | -3.808188274 | 0.791958056  | -0.667449047 |
| O | 0.993837070  | -5.044116368 | 0.618261043  |
| O | -1.273032093 | -5.718574415 | 0.684545049  |
| N | -0.260638020 | -5.012973361 | 0.261867018  |

#### T2T1

|   |              |              |              |
|---|--------------|--------------|--------------|
| C | 1.525689109  | 1.464212106  | -0.228473018 |
| C | 2.088104150  | 0.199901013  | -0.414223027 |
| C | 1.309944095  | -0.968699071 | -0.474264034 |
| C | -0.058933004 | -0.842247061 | -0.335150024 |
| C | -0.638808048 | 0.428822033  | -0.159033009 |
| C | 0.136298009  | 1.560826113  | -0.112285009 |
| C | -2.400615172 | -1.097191081 | -0.206922015 |
| C | -3.711742270 | -1.531218112 | -0.165057015 |
| C | -4.721772344 | -0.599420041 | 0.028204004  |
| C | -4.423287318 | 0.749266057  | 0.168614012  |
| C | -3.110301226 | 1.188698088  | 0.116195010  |
| C | -2.103100150 | 0.256707016  | -0.070291006 |
| H | -1.005469074 | -2.639541193 | 0.417343030  |
| H | 2.159012156  | 2.326277167  | -0.179747012 |
| H | 1.764044126  | -1.931445142 | -0.672510050 |
| H | -0.309847022 | 2.529721181  | 0.021167000  |
| C | -1.131637080 | -1.908766140 | -0.375804029 |
| H | -1.117827083 | -2.462807178 | -1.334916096 |

|   |              |              |              |
|---|--------------|--------------|--------------|
| H | -3.951400285 | -2.574928185 | -0.270481018 |
| H | -5.745665417 | -0.924241065 | 0.073966004  |
| H | -5.217685379 | 1.457896106  | 0.319960023  |
| H | -2.885577207 | 2.234931162  | 0.223688017  |
| O | 3.705583271  | -1.401080102 | -0.445585035 |
| O | 4.418029318  | 0.639130047  | -0.401679029 |
| N | 3.426738246  | -0.002518000 | -0.529744040 |

T3T2

|   |              |              |              |
|---|--------------|--------------|--------------|
| C | -2.162299156 | -3.242907235 | -0.163376014 |
| C | -0.789783058 | -3.526408257 | 0.206928016  |
| C | 0.154911009  | -2.477016180 | 0.424736033  |
| C | -0.282862020 | -1.187088088 | 0.289916021  |
| C | -1.650101120 | -0.889315065 | -0.054354002 |
| C | -2.574880189 | -1.974476142 | -0.286018022 |
| C | -0.574058042 | 1.157073085  | 0.182105015  |
| C | -0.466017034 | 2.511514182  | 0.180582011  |
| C | -1.601467117 | 3.296839239  | -0.109661010 |
| C | -2.812023204 | 2.705661197  | -0.391299027 |
| C | -2.945779215 | 1.317407098  | -0.396742027 |
| C | -1.821958131 | 0.530184040  | -0.109923005 |
| H | 1.309912096  | 0.175917012  | -0.251400019 |
| H | -2.830178207 | -4.065286294 | -0.324274024 |
| H | 1.166399083  | -2.718467196 | 0.683594049  |
| H | -3.593821258 | -1.764822128 | -0.556196039 |
| C | 0.487706035  | 0.107531008  | 0.454132030  |
| H | 0.908188066  | 0.204600017  | 1.450397103  |
| H | 0.472224034  | 2.992381215  | 0.397681031  |
| H | -1.516011108 | 4.368610317  | -0.110106005 |

|      |              |              |              |
|------|--------------|--------------|--------------|
| H    | -3.667070264 | 3.319835240  | -0.611300044 |
| H    | -3.895155284 | 0.865565061  | -0.620411047 |
| O    | 0.778160055  | -5.131672374 | 0.691736050  |
| O    | -1.185486088 | -5.791169421 | 0.192884012  |
| N    | -0.387919029 | -4.857122353 | 0.364731027  |
| S0T1 |              |              |              |
| C    | -2.157084156 | -3.224739236 | -0.163116014 |
| C    | -0.813447060 | -3.500751252 | 0.213416015  |
| C    | 0.120604009  | -2.451692175 | 0.435615034  |
| C    | -0.323635021 | -1.154262085 | 0.289151022  |
| C    | -1.660448123 | -0.867555063 | -0.063425005 |
| C    | -2.570481186 | -1.907890140 | -0.295454020 |
| C    | -0.591839043 | 1.190169085  | 0.178632014  |
| C    | -0.460556036 | 2.565165188  | 0.182487012  |
| C    | -1.567092112 | 3.348773245  | -0.116412010 |
| C    | -2.787944200 | 2.759759199  | -0.414777028 |
| C    | -2.923239212 | 1.379419099  | -0.419513032 |
| C    | -1.818657134 | 0.599193045  | -0.122712008 |
| H    | 1.287317095  | 0.191032013  | -0.234192017 |
| H    | -2.840182208 | -4.037313291 | -0.324475021 |
| H    | 1.132308082  | -2.683263193 | 0.712449052  |
| H    | -3.588681259 | -1.701719122 | -0.572223040 |
| C    | 0.456333032  | 0.132637007  | 0.462371034  |
| H    | 0.867003063  | 0.224162017  | 1.463531108  |
| H    | 0.483215035  | 3.028608219  | 0.412329028  |
| H    | -1.477633105 | 4.420502322  | -0.117278008 |
| H    | -3.636329262 | 3.379083247  | -0.645379048 |
| H    | -3.872476282 | 0.930634066  | -0.653859045 |

|      |              |              |              |
|------|--------------|--------------|--------------|
| O    | 0.690517047  | -5.316435383 | 0.719805050  |
| O    | -1.019258073 | -5.905725427 | 0.288853021  |
| N    | -0.425588030 | -4.762808346 | 0.383146030  |
| S1T1 |              |              |              |
| C    | -2.181011154 | -3.233284231 | -0.159005010 |
| C    | -0.848929062 | -3.513154251 | 0.201924016  |
| C    | 0.090976004  | -2.504640180 | 0.421647030  |
| C    | -0.333720023 | -1.186174087 | 0.283183019  |
| C    | -1.666276121 | -0.898133063 | -0.060830004 |
| C    | -2.583454188 | -1.947301139 | -0.286191021 |
| C    | -0.576143042 | 1.160103085  | 0.176786011  |
| C    | -0.443206034 | 2.540713182  | 0.177833015  |
| C    | -1.577059112 | 3.327260242  | -0.120074006 |
| C    | -2.779246199 | 2.736565196  | -0.403993031 |
| C    | -2.911023208 | 1.332170095  | -0.406052028 |
| C    | -1.830799132 | 0.569385041  | -0.123056010 |
| H    | 1.290254092  | 0.136676011  | -0.246697020 |
| H    | -2.854283204 | -4.052554294 | -0.316498023 |
| H    | 1.106679081  | -2.739356198 | 0.689551050  |
| H    | -3.601741258 | -1.733819125 | -0.557052042 |
| C    | 0.463440036  | 0.091104007  | 0.454346035  |
| H    | 0.877587063  | 0.172580010  | 1.453939104  |
| H    | 0.498042037  | 3.011156218  | 0.400212028  |
| H    | -1.492168106 | 4.399222316  | -0.123089009 |
| H    | -3.636483263 | 3.344758239  | -0.630060044 |
| H    | -3.864737276 | 0.889238064  | -0.634637046 |
| O    | 0.885078064  | -5.004920363 | 0.717839051  |
| O    | -1.120101080 | -5.824184420 | 0.224778017  |

|   |              |              |             |
|---|--------------|--------------|-------------|
| N | -0.467875033 | -4.833897346 | 0.347718026 |
|---|--------------|--------------|-------------|

S1T2

|   |              |              |              |
|---|--------------|--------------|--------------|
| C | -2.155141155 | -3.237178235 | -0.159792013 |
| C | -0.807890059 | -3.516795255 | 0.209290015  |
| C | 0.130857009  | -2.471318180 | 0.427891030  |
| C | -0.309400021 | -1.171855086 | 0.287170020  |
| C | -1.657153121 | -0.879737062 | -0.060296006 |
| C | -2.570715188 | -1.936120142 | -0.288706021 |
| C | -0.583332042 | 1.171184084  | 0.176504013  |
| C | -0.460414031 | 2.543547186  | 0.177185011  |
| C | -1.584135117 | 3.325536241  | -0.117433010 |
| C | -2.795235204 | 2.732207199  | -0.404310029 |
| C | -2.926088212 | 1.342991098  | -0.407444029 |
| C | -1.820350131 | 0.567488041  | -0.118828011 |
| H | 1.295981092  | 0.175477012  | -0.247738017 |
| H | -2.826292204 | -4.056235294 | -0.319412023 |
| H | 1.144659084  | -2.698431196 | 0.692877051  |
| H | -3.589560260 | -1.730411123 | -0.561738038 |
| C | 0.470226036  | 0.116245007  | 0.454390031  |
| H | 0.886412062  | 0.208848014  | 1.452786106  |
| H | 0.480779036  | 3.015220219  | 0.399857029  |
| H | -1.499848109 | 4.397563319  | -0.119551010 |
| H | -3.649970266 | 3.344642243  | -0.629524046 |
| H | -3.875968280 | 0.892669064  | -0.634997046 |
| O | 0.812983056  | -5.090012371 | 0.703709050  |
| O | -1.182508085 | -5.802867419 | 0.204073015  |
| N | -0.427653033 | -4.852360350 | 0.359730027  |

S1T3



|                       |              |              |              |
|-----------------------|--------------|--------------|--------------|
| C                     | -2.120703152 | -3.262064234 | -0.151538012 |
| C                     | -0.787277054 | -3.524090254 | 0.211380016  |
| C                     | 0.142378012  | -2.515635181 | 0.434598029  |
| C                     | -0.310521025 | -1.158207086 | 0.287923023  |
| C                     | -1.685660122 | -0.881214065 | -0.063388005 |
| C                     | -2.561149187 | -1.881838135 | -0.282426020 |
| C                     | -0.572074040 | 1.178115083  | 0.177733011  |
| C                     | -0.444531030 | 2.527104183  | 0.175913012  |
| C                     | -1.581102116 | 3.330616242  | -0.117826008 |
| C                     | -2.832222207 | 2.715332197  | -0.405939027 |
| C                     | -2.965258214 | 1.365898101  | -0.406426029 |
| C                     | -1.828412130 | 0.561268039  | -0.113969010 |
| H                     | 1.302263093  | 0.173749010  | -0.251185020 |
| H                     | -2.802384204 | -4.070272297 | -0.308817021 |
| H                     | 1.151615082  | -2.746905198 | 0.704881051  |
| H                     | -3.584172261 | -1.694244123 | -0.549812040 |
| C                     | 0.474649037  | 0.114759008  | 0.451607035  |
| H                     | 0.898468064  | 0.209366015  | 1.448592106  |
| H                     | 0.497654039  | 2.999071217  | 0.392384031  |
| H                     | -1.497848110 | 4.400875318  | -0.122748008 |
| H                     | -3.679152264 | 3.340432242  | -0.625759045 |
| H                     | -3.912248281 | 0.907072068  | -0.625788044 |
| O                     | 0.780409059  | -5.123095369 | 0.680312049  |
| O                     | -1.188031087 | -5.778786420 | 0.183503012  |
| N                     | -0.371566028 | -4.905418355 | 0.367503026  |
| TS-1(MN15/6-31G*/PCM) |              |              |              |
| C                     | 1.861517000  | 1.566221000  | -0.112558000 |
| C                     | 2.444881000  | 0.247596000  | 0.004375000  |

|   |              |              |              |
|---|--------------|--------------|--------------|
| C | 1.608451000  | -0.927873000 | 0.023197000  |
| C | 0.256179000  | -0.752704000 | 0.023096000  |
| C | -0.318292000 | 0.558038000  | -0.041331000 |
| C | 0.500217000  | 1.710653000  | -0.118192000 |
| C | -2.095403000 | -0.937862000 | 0.033593000  |
| C | -3.427845000 | -1.328940000 | 0.051898000  |
| C | -4.419254000 | -0.342964000 | 0.007633000  |
| C | -4.084922000 | 1.018730000  | -0.054461000 |
| C | -2.753839000 | 1.420435000  | -0.073825000 |
| C | -1.757766000 | 0.433349000  | -0.030007000 |
| H | -0.788486000 | -2.396397000 | 0.979654000  |
| H | 2.537544000  | 2.412129000  | -0.179809000 |
| H | 2.091202000  | -1.900383000 | 0.048465000  |
| H | 0.052628000  | 2.698113000  | -0.192368000 |
| C | -0.845980000 | -1.784930000 | 0.070851000  |
| H | -0.790468000 | -2.477000000 | -0.778407000 |
| H | -3.698891000 | -2.380554000 | 0.099730000  |
| H | -5.465831000 | -0.635090000 | 0.021737000  |
| H | -4.875107000 | 1.763596000  | -0.087522000 |
| H | -2.490735000 | 2.474311000  | -0.121565000 |
| O | 3.670647000  | 0.210911000  | 1.149938000  |
| O | 4.422409000  | -0.889071000 | -0.761828000 |
| N | 3.839433000  | 0.084010000  | -0.228632000 |

TS-2(MN15/6-31G\*/PCM)

|   |              |              |              |
|---|--------------|--------------|--------------|
| H | -0.713773000 | -2.512712000 | -0.561832000 |
| C | -4.043458000 | 1.019204000  | -0.243197000 |
| C | -4.383928000 | -0.339993000 | -0.148466000 |
| C | -3.398239000 | -1.322542000 | 0.009952000  |

|                      |              |              |              |
|----------------------|--------------|--------------|--------------|
| C                    | -2.069115000 | -0.932262000 | 0.072414000  |
| C                    | -1.721712000 | 0.439342000  | -0.024877000 |
| C                    | -2.715464000 | 1.422680000  | -0.182335000 |
| H                    | -4.828556000 | 1.760213000  | -0.365358000 |
| H                    | -5.429073000 | -0.632979000 | -0.198065000 |
| H                    | -3.674648000 | -2.371320000 | 0.083477000  |
| H                    | -2.448322000 | 2.473999000  | -0.255755000 |
| C                    | -0.826935000 | -1.775296000 | 0.242042000  |
| H                    | -0.835845000 | -2.335671000 | 1.184876000  |
| C                    | 0.281725000  | -0.746304000 | 0.216775000  |
| C                    | 1.619769000  | -0.923074000 | 0.332902000  |
| C                    | 2.507342000  | 0.253467000  | 0.297237000  |
| C                    | 1.878053000  | 1.588545000  | 0.165936000  |
| C                    | 0.531192000  | 1.727381000  | 0.051519000  |
| C                    | -0.296461000 | 0.567462000  | 0.063463000  |
| H                    | 2.090544000  | -1.892512000 | 0.468394000  |
| H                    | 2.556671000  | 2.435661000  | 0.178993000  |
| H                    | 0.083082000  | 2.714447000  | -0.033321000 |
| O                    | 3.709951000  | 0.171697000  | 0.961119000  |
| O                    | 4.131429000  | -0.964706000 | -1.085212000 |
| N                    | 3.756040000  | 0.119039000  | -0.661265000 |
| INT(MN15/6-31G*/PCM) |              |              |              |
| H                    | -0.879055000 | -2.285501000 | 1.159360000  |
| C                    | -4.127716000 | 1.027654000  | -0.281984000 |
| C                    | -4.434839000 | 0.055775000  | 0.682475000  |
| C                    | -3.428358000 | -0.720937000 | 1.268548000  |
| C                    | -2.111981000 | -0.514907000 | 0.880305000  |
| C                    | -1.800034000 | 0.464569000  | -0.092752000 |

|   |              |              |              |
|---|--------------|--------------|--------------|
| C | -2.812159000 | 1.242034000  | -0.678746000 |
| H | -4.927241000 | 1.617531000  | -0.721741000 |
| H | -5.469426000 | -0.095343000 | 0.978339000  |
| H | -3.677222000 | -1.471166000 | 2.015022000  |
| H | -2.571894000 | 1.994636000  | -1.425870000 |
| C | -0.853474000 | -1.205878000 | 1.350922000  |
| H | -0.692963000 | -1.080973000 | 2.428639000  |
| C | 0.226385000  | -0.520664000 | 0.542966000  |
| C | 1.566324000  | -0.730671000 | 0.547830000  |
| C | 2.413897000  | 0.091510000  | -0.323850000 |
| C | 1.772959000  | 1.087839000  | -1.196627000 |
| C | 0.421849000  | 1.263637000  | -1.176271000 |
| C | -0.376099000 | 0.470442000  | -0.309360000 |
| H | 2.058564000  | -1.472415000 | 1.170474000  |
| H | 2.428372000  | 1.667787000  | -1.838370000 |
| H | -0.043356000 | 2.007186000  | -1.818665000 |
| O | 3.722944000  | 0.501135000  | 0.257410000  |
| O | 4.100327000  | -1.639624000 | -0.607536000 |
| N | 3.661225000  | -0.485854000 | -0.780092000 |

Free Radical(MN15/6-31G\*/PCM)

|   |              |              |              |
|---|--------------|--------------|--------------|
| H | -0.598409000 | -2.214063000 | 0.848354000  |
| C | -4.204662000 | 0.835692000  | -0.279036000 |
| C | -4.417929000 | -0.308969000 | 0.503893000  |
| C | -3.343852000 | -1.032353000 | 1.031411000  |
| C | -2.050891000 | -0.598433000 | 0.766916000  |
| C | -1.835359000 | 0.553442000  | -0.022224000 |
| C | -2.913887000 | 1.277835000  | -0.549661000 |
| H | -5.057149000 | 1.380289000  | -0.675006000 |

|   |              |              |              |
|---|--------------|--------------|--------------|
| H | -5.434593000 | -0.636743000 | 0.703978000  |
| H | -3.521067000 | -1.917071000 | 1.637602000  |
| H | -2.744535000 | 2.163655000  | -1.155529000 |
| C | -0.732076000 | -1.185700000 | 1.208602000  |
| H | -0.641179000 | -1.221656000 | 2.302119000  |
| C | 0.275227000  | -0.243676000 | 0.589572000  |
| C | 1.639838000  | -0.267041000 | 0.646372000  |
| C | 2.410172000  | 0.754900000  | -0.046573000 |
| C | 1.672706000  | 1.783037000  | -0.775699000 |
| C | 0.302890000  | 1.793510000  | -0.819535000 |
| C | -0.410175000 | 0.778127000  | -0.138281000 |
| H | 2.190037000  | -1.025771000 | 1.196328000  |
| H | 2.267045000  | 2.538103000  | -1.282583000 |
| H | -0.232881000 | 2.565543000  | -1.367415000 |
| O | 3.664731000  | 0.755816000  | -0.025152000 |
| O | 3.759016000  | -2.464792000 | -0.544311000 |
| N | 4.172959000  | -1.713522000 | -1.321545000 |
